# Supplementary material for: Genome-Wide Identification and Expression Analysis of Kiwifruit Leucine-Rich Repeat Receptor-Like Proteins Reveal Their Roles in Biotic and Abiotic Stress Responses
Source: MDPI journal article supplement (doi:10.3390/ijms25084497), 2024-04-19
Supplement: s1 [file s1]

# SUPPLEMENTARY FIGURES

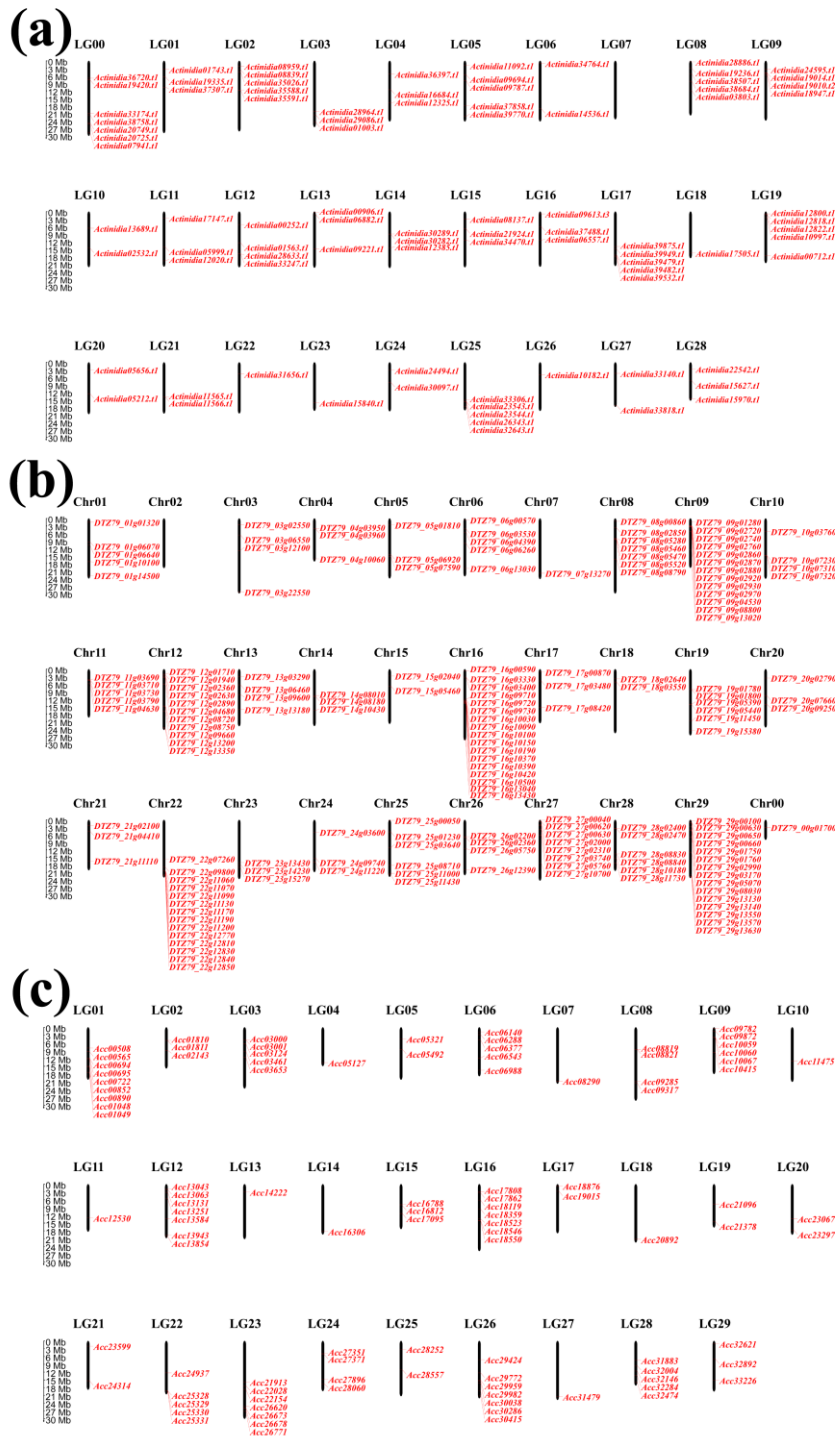

**Supplementary Figure S1. Chromosomal location of *LRR-RLP* genes in kiwifruit.**

(a) Chromosomal location of *LRR-RLP* genes in *Actinidia chinensis* ‘Hongyang’. (b)

Chromosomal location of *LRR-RLP* genes in *Actinidia eriantha* ‘Huatae’. (c)

Chromosomal location of *LRR-RLP* genes in *Actinidia chinensis* ‘Red5’.
