# Supplementary material for: Genome-Wide Identification and Expression Analysis of Kiwifruit Leucine-Rich Repeat Receptor-Like Proteins Reveal Their Roles in Biotic and Abiotic Stress Responses
Source: Int J Mol Sci. 2024 Apr 19;25(8):4497. doi: 10.3390/ijms25084497 (PMC11050117; doi:10.3390/ijms25084497)
Supplement: Supplementary file 1 [file ijms-25-04497-s001.zip]

Archive with 8 entries (8 files):
- Supplementary_Figure.pdf
- Table S1.xlsx
- Table S2.xlsx
- Table S3.xlsx
- Table S4.xlsx
- Table S5.xlsx
- Table S6.xlsx
- Table S7.xlsx
