# Supplementary material for: Genome-Wide Identification and Expression Analysis of Kiwifruit Leucine-Rich Repeat Receptor-Like Proteins Reveal Their Roles in Biotic and Abiotic Stress Responses
Source: Int J Mol Sci. 2024 Apr 19;25(8):4497. doi: 10.3390/ijms25084497 (PMC11050117; doi:10.3390/ijms25084497)
Supplement: Supplementary file 1 [file ijms-25-04497-s001.zip › Table S1.xlsx]

## Sheet: Sheet1
Table S1.Detailed information for LRR-RLP genes in Actinidia chinensis 'Hongyang' genome
Sequence ID	Chromosome	Start Position	End Position	Number of Amino Acid	Molecular Weight	Theoretical pI	Instability Index	Aliphatic Index	Grand Average of Hydropathicity
Actinidia00252.t1	Lachesis_group12	4645462	4648128	117	12.5953	4.7	32.15	112.48	0.11
Actinidia00712.t1	Lachesis_group19	16013441	16015167	469	53.0133	9	34.84	113.88	0.091
Actinidia00906.t1	Lachesis_group13	288081	289369	262	29.1653	5.3	49.27	90.38	-0.184
Actinidia01003.t1	Lachesis_group3	21978329	21980105	280	30.8764	5.11	28.9	109.25	-0.099
Actinidia01563.t1	Lachesis_group12	11278961	11280325	354	39.1545	4.72	34.54	102.71	-0.163
Actinidia01743.t1	Lachesis_group1	3120836	3122313	360	40.1831	5.58	40.1	89.89	-0.053
Actinidia02532.t1	Lachesis_group10	13312487	13314748	633	68.3407	8.6	76.79	63.63	-0.414
Actinidia02870.t1	Contig00167	370	4806	524	58.4542	6.35	33.34	108.61	0.036
Actinidia02887.t1	Contig00186	47	5481	460	49.8325	7.11	43.21	109.35	-0.02
Actinidia03803.t1	Lachesis_group8	10789105	10790761	418	45.972	8.44	45.08	90.29	-0.114
Actinidia04531.t1	Contig00279	47338	49258	309	34.0993	9.1	30.37	93.69	-0.115
Actinidia04672.t1	Contig00328	27294	31597	261	28.1332	6.14	37.81	98.97	0.032
Actinidia05212.t1	Lachesis_group20	11356668	11368163	584	63.888	5.96	50.28	116.54	-0.022
Actinidia05656.t1	Lachesis_group20	2736397	2738517	662	72.7877	4.56	35.96	106.21	-0.043
Actinidia05999.t1	Lachesis_group11	12858229	12860022	159	17.6653	8.28	33.88	92.58	-0.118
Actinidia06557.t1	Lachesis_group16	10349625	10364739	501	56.2991	6.38	39.74	92.99	-0.34
Actinidia06882.t1	Lachesis_group13	1106309	1107540	372	40.3637	8.61	35.05	106.8	0.173
Actinidia07941.t1	Lachesis_group0	26000608	26002059	397	42.6372	5.82	52.45	81.96	-0.169
Actinidia08137.t1	Lachesis_group15	2772346	2775465	330	36.7061	5.21	38.17	109.85	-0.136
Actinidia08378.t1	Contig00440	24687	28390	243	27.1151	6.44	35.06	101.11	-0.084
Actinidia08839.t1	Lachesis_group2	3169250	3171128	501	56.1501	10.3	47.63	90.68	-0.359
Actinidia08959.t1	Lachesis_group2	1885362	1890527	515	57.2564	4.82	50.88	106.19	-0.23
Actinidia09221.t1	Lachesis_group13	13394374	13397704	534	59.1091	5.31	46.17	102.79	-0.152
Actinidia09613.t3	Lachesis_group16	849929	862725	281	31.3383	9.02	38.95	100.6	-0.012
Actinidia09694.t1	Lachesis_group5	4996779	4999301	676	72.3941	6.32	31.52	109.73	0.17
Actinidia09787.t1	Lachesis_group5	7088932	7093383	980	108.485	5.61	37.51	105.95	-0.042
Actinidia10182.t1	Lachesis_group26	4425440	4426406	284	30.4788	4.81	33.42	110.53	0.083
Actinidia10997.t1	Lachesis_group19	2144319	2146204	576	62.8319	5.16	28.57	109.01	0.053
Actinidia11092.t1	Lachesis_group5	1714549	1715871	397	43.9936	6.66	44.48	92.12	-0.088
Actinidia11565.t1	Lachesis_group21	12530799	12545158	1613	177.988	5.38	40.48	97.71	-0.044
Actinidia11566.t1	Lachesis_group21	12550329	12552899	444	49.471	6.31	35.72	106.46	0.079
Actinidia12020.t1	Lachesis_group11	17838396	17843046	590	63.9674	7.11	33.72	92.9	-0.236
Actinidia12325.t1	Lachesis_group4	15194578	15202129	328	37.1982	8.54	37.41	110.79	-0.005
Actinidia12385.t1	Lachesis_group14	13065158	13069065	419	44.9352	6.4	34.8	100.91	0.032
Actinidia12800.t1	Lachesis_group19	817249	818998	557	59.7746	6.7	32.02	112.01	0.186
Actinidia12818.t1	Lachesis_group19	1047777	1048898	341	37.3001	8.71	42.32	105.72	0.128
Actinidia12822.t1	Lachesis_group19	1111479	1119453	383	41.8263	8.63	37.89	96.97	-0.015
Actinidia13166.t1	Contig00832	4279	8046	411	46.5312	5.19	35.05	106.93	-0.163
Actinidia13689.t1	Lachesis_group10	6030867	6034974	479	52.7216	6.34	34.19	102.32	0.055
Actinidia14187.t1	Contig00933	4652	5222	165	18.0456	5.09	42.62	105.15	-0.002
Actinidia14325.t1	Contig00953	12558	16912	172	19.7814	4.95	34.68	88.49	-0.362
Actinidia14536.t1	Lachesis_group6	17397752	17399377	512	57.4727	7.62	39	100.55	-0.091
Actinidia15627.t1	Lachesis_group28	6644008	6649177	259	28.4648	6.28	40.95	99.69	-0.037
Actinidia15840.t1	Lachesis_group23	14606268	14606977	144	15.9326	5.22	26.14	115.76	0.181
Actinidia15970.t1	Lachesis_group28	13294996	13295784	220	24.0036	10	22.51	86.55	-0.204
Actinidia16103.t1	Contig01001	78178	78838	134	14.7299	5.21	28.03	111.94	0.111
Actinidia16684.t1	Lachesis_group4	10506568	10509165	440	47.6565	5.92	39.73	97.89	-0.038
Actinidia17147.t1	Lachesis_group11	2406951	2408194	149	16.9225	8.6	50.18	96.85	-0.264
Actinidia17505.t1	Lachesis_group18	15037119	15039015	431	46.6544	5.75	34.15	98.12	-0.036
Actinidia18947.t1	Lachesis_group9	5007292	5010060	317	35.3476	4.86	27.25	102.05	0.031
Actinidia19010.t2	Lachesis_group9	4344489	4349802	357	40.2937	8.28	43.59	107.59	-0.09
Actinidia19014.t1	Lachesis_group9	4291881	4294001	446	49.0657	9.11	38.66	92.04	-0.028
Actinidia19236.t1	Lachesis_group8	2675732	2677492	524	56.7002	8.7	33.49	105.46	0.045
Actinidia19335.t1	Lachesis_group1	5751544	5754447	929	101.49	5.43	31.17	109.53	0.014
Actinidia19420.t1	Lachesis_group0	6879383	6882339	913	100.3	5.54	31.13	100.77	-0.037
Actinidia20725.t1	Lachesis_group0	22804570	22806795	607	66.4652	9.14	38.6	115.67	0.141
Actinidia20749.t1	Lachesis_group0	22358629	22362043	1079	118.489	5.9	43.59	96.12	-0.019
Actinidia21924.t1	Lachesis_group15	6300411	6303757	491	55.3325	4.97	34.39	94.11	-0.207
Actinidia22542.t1	Lachesis_group28	2416123	2420855	693	74.7207	7.18	38.17	94.1	-0.102
Actinidia23543.t1	Lachesis_group25	14071579	14157818	1094	123.745	5.13	36.28	100.22	-0.069
Actinidia23544.t1	Lachesis_group25	14127259	14133163	641	71.3818	5.37	37.05	99.42	0.053
Actinidia24494.t1	Lachesis_group24	2945253	2945989	216	23.5561	4.9	28	100.97	0.197
Actinidia24595.t1	Lachesis_group9	3112856	3119710	357	39.958	5.97	49.28	108.66	-0.153
Actinidia26343.t1	Lachesis_group25	14285521	14305701	1059	119.602	5.04	40.1	103.28	-0.034
Actinidia28324.t1	Contig01744	18108	20361	245	28.1119	5.11	49.9	93.88	-0.316
Actinidia28383.t1	Contig01758	19499	21001	347	37.9266	7.71	44.73	102.56	-0.007
Actinidia28633.t1	Lachesis_group12	15256300	15262408	276	31.3882	6.45	36.3	106.27	-0.144
Actinidia28886.t1	Lachesis_group8	371721	374822	300	33.0843	4.86	38.72	104.93	-0.031
Actinidia28964.t1	Lachesis_group3	18271286	18273961	337	37.5073	4.84	31.64	87.36	-0.209
Actinidia29086.t1	Lachesis_group3	19540023	19550479	2136	234.249	6.03	35.34	100.98	0.086
Actinidia30097.t1	Lachesis_group24	7319528	7322535	354	37.6472	5.79	43.38	109.89	0.181
Actinidia30282.t1	Lachesis_group14	8297874	8300887	290	32.0644	8.15	36.1	85.03	-0.212
Actinidia30289.t1	Lachesis_group14	8137662	8140521	669	74.2137	5.71	42.59	101.33	0.018
Actinidia31656.t1	Lachesis_group22	4307088	4307841	143	16.3558	7.03	42.91	84.48	-0.048
Actinidia32643.t1	Lachesis_group25	15958945	15960099	336	36.5967	4.74	45.03	95.71	0.038
Actinidia33140.t1	Lachesis_group27	4004295	4004790	154	16.3418	8.26	38.79	85.52	0.231
Actinidia33174.t1	Lachesis_group0	18998873	19000797	606	66.9243	5.38	46.49	100.87	-0.126
Actinidia33247.t1	Lachesis_group12	15291764	15298099	350	39.7189	8.59	39.81	108	-0.081
Actinidia33306.t1	Lachesis_group25	13678253	13679525	175	19.0768	4.97	32.31	101.43	0.121
Actinidia33818.t1	Lachesis_group27	15579110	15581329	640	70.3162	5.32	30.95	117.53	0.17
Actinidia34011.t1	Contig02072_ERROPOS626542	7075	8717	199	21.8141	9.05	26.17	104.82	0.004
Actinidia34012.t1	Contig02072_ERROPOS626542	21865	25022	171	19.1178	4.67	47.34	94.04	-0.099
Actinidia34470.t1	Lachesis_group15	10319904	10324567	296	32.5977	5.14	40.46	110.98	0.073
Actinidia34764.t1	Lachesis_group6	933917	937975	733	81.1524	5.51	36.37	109.69	0.062
Actinidia35026.t1	Lachesis_group2	4027122	4036632	261	29.384	6.45	45.13	106.4	-0.265
Actinidia35588.t1	Lachesis_group2	10577649	10578851	148	16.8026	9.13	54.56	110.07	-0.084
Actinidia35591.t1	Lachesis_group2	10631084	10636243	200	22.0145	9.3	33.16	100.95	-0.004
Actinidia36397.t1	Lachesis_group4	4797550	4801375	758	81.9411	6.35	29.57	105	0.108
Actinidia36720.t1	Lachesis_group0	6275903	6277113	374	39.8768	5.86	32.89	101.71	0.15
Actinidia37307.t1	Lachesis_group1	9434688	9436879	355	39.8605	5.73	44.83	93.86	-0.164
Actinidia37488.t1	Lachesis_group16	5420996	5421923	262	28.5327	4.74	44.74	118.05	0.073
Actinidia37858.t1	Lachesis_group5	16280589	16287530	221	24.1446	5.75	27.43	114.57	-0.005
Actinidia38507.t1	Lachesis_group8	4653281	4662742	520	57.3805	4.94	41.41	91.63	-0.4
Actinidia38684.t1	Lachesis_group8	7356871	7373978	1095	122.359	5.37	33.69	94.61	-0.12
Actinidia38758.t1	Lachesis_group0	19580200	19580993	264	29.3837	4.45	29.73	109.2	0.019
Actinidia39479.t1	Lachesis_group17	15733341	15734075	174	19.2858	5.45	42.09	94.14	-0.251
Actinidia39482.t1	Lachesis_group17	15763526	15764412	262	28.6558	6.16	33.34	108.63	-0.069
Actinidia39532.t1	Lachesis_group17	16369494	16374174	323	36.0023	6.13	30.06	104.74	-0.096
Actinidia39770.t1	Lachesis_group5	20110031	20116115	433	47.3019	4.88	41.46	94.78	-0.078
Actinidia39875.t1	Lachesis_group17	12653151	12656599	430	47.3	6.12	46.85	88.44	-0.137
Actinidia39949.t1	Lachesis_group17	13551149	13556104	495	54.3194	4.99	27.07	111.62	0.11
