# Supplementary material for: Genome-Wide Identification and Expression Analysis of Kiwifruit Leucine-Rich Repeat Receptor-Like Proteins Reveal Their Roles in Biotic and Abiotic Stress Responses
Source: Int J Mol Sci. 2024 Apr 19;25(8):4497. doi: 10.3390/ijms25084497 (PMC11050117; doi:10.3390/ijms25084497)
Supplement: Supplementary file 1 [file ijms-25-04497-s001.zip › Table S2.xlsx]

## Sheet: Sheet1
Table S2. Detailed information for LRR-RLP genes in the Actinidia eriantha ‘Huate’ genome.
Sequence ID	Chromosome	Start position	End position	Number of Amino Acid	Molecular Weight	Theoretical pI	Instability Index	Aliphatic Index	Grand Average of Hydropathicity
DTZ79_03g06550	Chr03	6684199	6686033	206	22.7248	5.19	42.06	87.52	0.012
DTZ79_29g13630	Chr29	23051725	23052944	230	25.7383	6.3	38.98	102.17	-0.287
DTZ79_28g02400	Chr28	3450557	3459035	767	84.9927	8.71	38.04	108.14	0.014
DTZ79_22g12840	Chr22	22435718	22441289	364	40.7017	6.21	26.93	110.82	0.062
DTZ79_06g06260	Chr06	10104321	10104746	141	15.778	5.84	26.58	94.68	-0.017
DTZ79_10g03760	Chr10	5323250	5325184	644	69.2848	6.56	79.36	72.34	-0.322
DTZ79_29g01760	Chr29	2642723	2644003	260	29.1384	7.75	30.8	91.12	-0.278
DTZ79_16g10030	Chr16	12774902	12775883	307	35.1533	8.46	44.21	84.72	-0.202
DTZ79_12g02360	Chr12	2790754	2791645	295	32.9278	6.55	32.55	95.9	0.018
DTZ79_06g00570	Chr06	578656	580734	201	22.3698	8.91	38.83	108.56	-0.032
DTZ79_24g03600	Chr24	4952631	4954199	338	37.4806	9.02	44.36	109.64	0.086
DTZ79_28g08830	Chr28	13807781	13809791	616	68.4094	5.88	29.69	108.02	0.056
DTZ79_05g07590	Chr05	15510923	15512116	397	42.5505	5.84	37.45	99.14	0.056
DTZ79_24g09740	Chr24	15532698	15534964	336	37.7634	6.11	49.69	92.29	0.06
DTZ79_14g08180	Chr14	11153294	11156102	180	19.889	4.3	32.61	115.78	0.508
DTZ79_03g22550	Chr03	29931476	29934209	722	79.7771	6.2	28.82	108.37	0.15
DTZ79_24g11220	Chr24	17234993	17241093	1254	138.889	5.71	37.91	103.83	0.004
DTZ79_06g03530	Chr06	4318628	4320562	644	70.6258	6.25	33.26	106.85	-0.115
DTZ79_06g04390	Chr06	5501370	5507804	328	37.111	8.26	35.96	109.02	-0.03
DTZ79_16g09720	Chr16	12277275	12281864	773	86.8538	5.48	41.09	97.34	-0.107
DTZ79_11g04630	Chr11	5914898	5918396	838	91.849	5.83	32.06	103.42	-0.035
DTZ79_09g02720	Chr09	2964556	2965854	374	42.3835	6.18	42.37	88.32	-0.096
DTZ79_22g11090	Chr22	20576183	20576572	129	14.6226	6.26	38.61	101.24	-0.216
DTZ79_01g06070	Chr01	9516627	9517235	202	21.7018	6.02	34.16	107.72	0.05
DTZ79_04g10060	Chr04	16439942	16441297	375	40.9226	9.27	21.86	101.41	0.03
DTZ79_16g09710	Chr16	12271574	12276289	116	13.4535	7.6	60.21	100	-0.194
DTZ79_12g02890	Chr12	3358893	3359465	190	20.9371	8.93	25.28	105.74	-0.061
DTZ79_16g10420	Chr16	13756175	13757819	322	36.2327	9.88	52.39	113.85	0.052
DTZ79_22g11170	Chr22	20616592	20618231	500	55.7261	5.91	34.16	117.56	0.067
DTZ79_04g03950	Chr04	4175700	4179428	537	59.0965	9.38	34.12	105.12	-0.076
DTZ79_18g03550	Chr18	5218860	5221817	985	109.263	7.9	41.44	100.04	-0.083
DTZ79_05g06920	Chr05	14691927	14692458	137	15.1115	7.92	28.22	101.09	0.095
DTZ79_22g09800	Chr22	19146423	19154033	1093	119.608	7.2	39.18	110.52	0.099
DTZ79_27g02310	Chr27	2197398	2199403	506	56.8211	8.45	32.28	96.9	-0.212
DTZ79_09g02760	Chr09	3010577	3011135	159	18.3377	7.73	39.13	82.14	-0.364
DTZ79_22g11060	Chr22	20552743	20554960	653	73.2663	9.06	38.7	100.12	-0.074
DTZ79_16g00590	Chr16	641490	644693	975	106.814	5.54	36.41	104.39	0.051
DTZ79_29g05070	Chr29	6976352	6980170	477	52.5326	5.86	29.02	102.75	0.113
DTZ79_11g03710	Chr11	4346407	4348096	498	54.0409	5.83	34.8	110.26	-0.099
DTZ79_29g00630	Chr29	1139778	1145395	864	96.3373	9.1	40.81	98.15	-0.16
DTZ79_22g12850	Chr22	22441376	22443727	538	59.7811	5.74	32.15	99.29	-0.156
DTZ79_27g02000	Chr27	1932548	1934412	571	62.6865	7.4	25.43	101.24	0.158
DTZ79_27g05760	Chr27	6159175	6160738	454	49.2082	5.67	40.63	91.7	-0.218
DTZ79_13g06460	Chr13	6363895	6368204	1077	121.678	5.4	34.97	93.05	-0.19
DTZ79_16g09730	Chr16	12289770	12290108	112	13.0843	8.3	57.74	105.27	-0.103
DTZ79_27g00040	Chr27	90001	92145	671	73.2103	8.18	35.73	106.26	0.077
DTZ79_25g00050	Chr25	206751	208541	596	65.2852	9	36.54	104.06	-0.028
DTZ79_22g12830	Chr22	22433178	22434417	371	41.5633	6.89	42.52	98.19	-0.028
DTZ79_08g08790	Chr08	16485372	16494958	399	42.9605	8.89	46.33	99.97	0.036
DTZ79_10g07320	Chr10	15109541	15115609	408	44.6935	5.3	37.19	120.69	0.123
DTZ79_09g08800	Chr09	12763277	12788261	163	17.8865	4.67	33.05	101.66	0.139
DTZ79_25g03640	Chr25	11329957	11332861	477	52.4165	5.93	39.23	105.83	0.113
DTZ79_29g02990	Chr29	4086266	4087394	373	40.7737	5.89	32.89	113.43	0.048
DTZ79_22g12770	Chr22	22377085	22378580	342	39.0509	5.92	48.9	91.75	-0.151
DTZ79_08g05520	Chr08	8541616	8544356	592	65.7231	6.91	42.48	96.5	-0.199
DTZ79_08g05460	Chr08	8407511	8414633	530	59.5183	5.38	45.86	107.19	-0.013
DTZ79_21g04410	Chr21	4596712	4599031	519	56.2368	5.76	36.47	116.26	0.205
DTZ79_13g13180	Chr13	16443490	16449454	715	78.1716	6.33	41.47	84.7	-0.426
DTZ79_25g11000	Chr25	21688230	21691159	389	43.4263	8.62	27.75	99.02	-0.033
DTZ79_21g02100	Chr21	2192991	2194163	390	42.5398	6.14	41.1	105.79	0.019
DTZ79_19g05440	Chr19	14315645	14322797	668	74.128	6.62	40.07	92.23	-0.152
DTZ79_22g11070	Chr22	20566311	20567225	208	22.9157	9.3	29.24	111.01	0.135
DTZ79_01g10100	Chr01	17538882	17543664	327	36.8848	9.16	44.89	97.4	-0.307
DTZ79_08g02850	Chr08	3780277	3789417	478	52.4256	9.14	30.65	105.44	0.111
DTZ79_28g02470	Chr28	3546519	3550690	271	29.7763	6.53	33.42	101.81	0.152
DTZ79_09g02970	Chr09	3401802	3408913	722	81.8406	5.64	37.24	95.14	-0.048
DTZ79_13g09600	Chr13	10280031	10283638	335	36.6614	9.39	21.99	95.49	-0.01
DTZ79_05g01810	Chr05	2600896	2604314	450	49.9543	5.73	48.64	100.56	-0.198
DTZ79_09g02870	Chr09	3247841	3256979	876	98.4166	5.79	35.79	101.43	-0.045
DTZ79_28g10180	Chr28	15550841	15554875	817	92.6503	5.77	36.68	102	-0.065
DTZ79_03g02550	Chr03	2506685	2510355	525	56.6976	8.2	35.79	114.19	0.125
DTZ79_28g11730	Chr28	17479008	17481314	637	69.9827	7.93	31.73	107.41	0.108
DTZ79_08g05470	Chr08	8423987	8428403	720	79.4181	6.73	43.42	97.44	-0.054
DTZ79_12g04680	Chr12	5976542	5980139	198	21.5999	7.04	30.98	113.13	0.012
DTZ79_09g02920	Chr09	3296018	3313647	1010	114.524	5.59	37.28	98.4	-0.075
DTZ79_16g10500	Chr16	13883253	13888592	530	59.4865	9.6	44.62	112.02	0.14
DTZ79_16g10090	Chr16	12938644	12943483	730	81.6972	4.91	40.13	90.56	-0.103
DTZ79_13g03290	Chr13	2998116	3001461	331	36.716	5.04	42.12	106.59	-0.164
DTZ79_29g13550	Chr29	22943623	22946299	74	8.29429	4.32	45.73	51.49	-0.03
DTZ79_23g15270	Chr23	19275577	19279996	522	58.1425	5.04	47.55	106.82	-0.247
DTZ79_19g15380	Chr19	24997124	24999922	701	75.9816	5.48	31.71	109.2	0.116
DTZ79_18g02640	Chr18	3867940	3871770	99	10.9228	4.68	31.08	124.14	0.16
DTZ79_19g05390	Chr19	14221799	14223317	337	36.6075	5.33	42.14	100.98	-0.044
DTZ79_19g11450	Chr19	21086175	21095457	261	29.3359	6.45	43.01	107.89	-0.239
DTZ79_23g13430	Chr23	17358653	17361187	463	51.4431	5.87	31.81	93.24	-0.012
DTZ79_09g01280	Chr09	1389801	1390964	387	42.0598	4.63	38.66	95.94	0.063
DTZ79_07g13270	Chr07	22241818	22245110	213	23.8163	5.52	35.69	94.23	-0.201
DTZ79_03g12100	Chr03	12938380	12941418	537	58.3941	8.93	39.32	102.98	-0.019
DTZ79_26g02360	Chr26	7179434	7182654	508	56.2914	5	46.59	98.64	-0.219
DTZ79_12g13200	Chr12	23847937	23850697	630	69.5239	6.02	36.35	114.02	0.07
DTZ79_09g02880	Chr09	3257237	3257834	159	18.5523	4.91	34.44	98.68	-0.022
DTZ79_29g00650	Chr29	1195168	1199425	786	86.7081	5.32	39.97	99.21	0.122
DTZ79_16g13040	Chr16	28042349	28053761	465	53.1116	8.6	35.19	93.25	-0.097
DTZ79_11g03730	Chr11	4374667	4375579	271	29.586	8.83	37.61	105.09	0.143
DTZ79_01g06640	Chr01	10884427	10886062	507	55.1149	9.22	57.58	83.31	-0.247
DTZ79_11g03790	Chr11	4481167	4482121	223	24.6843	5.53	48.2	103.32	-0.103
DTZ79_20g09250	Chr20	14291522	14295252	192	20.7478	6.36	31.49	114.69	0.03
DTZ79_08g05280	Chr08	8037389	8040456	484	55.1526	4.91	44.02	93.22	-0.132
DTZ79_29g00660	Chr29	1208719	1220474	852	94.7261	9.18	37.77	104.1	-0.025
DTZ79_20g07660	Chr20	10658776	10660108	258	27.8892	9.24	43.86	96.05	-0.035
DTZ79_12g02630	Chr12	3099103	3103767	525	57.2448	10.08	51.59	86.76	-0.186
DTZ79_16g10390	Chr16	13683085	13683474	129	14.686	11.2	35.89	107.29	-0.012
DTZ79_23g14230	Chr23	18127642	18132894	380	42.1377	6.07	40.45	97.47	-0.134
DTZ79_15g05460	Chr15	6824637	6836140	594	64.671	6.25	48.97	112.76	0.016
DTZ79_17g00870	Chr17	1237892	1239279	459	49.7883	6.58	35.18	101.72	0.119
DTZ79_14g08010	Chr14	10671655	10678376	126	13.9744	7.69	41.46	109.05	0.087
DTZ79_16g03330	Chr16	3239462	3240877	471	52.158	6.46	38.76	99.11	-0.074
DTZ79_16g03400	Chr16	3307568	3308819	369	41.1418	9.69	42.85	101.17	-0.081
DTZ79_16g10370	Chr16	13506331	13508522	724	79.0141	5.36	32.68	97.06	0.092
DTZ79_27g00620	Chr27	597852	606864	1260	138.652	5.5	31.92	102.89	-0.083
DTZ79_25g01230	Chr25	4899462	4902859	1119	123.093	5.84	31.35	102.37	-0.052
DTZ79_04g03960	Chr04	4190535	4191777	356	38.205	6.6	36.73	117.5	0.022
DTZ79_09g02740	Chr09	2973087	2973659	152	17.1496	5.74	21.62	97.5	-0.061
DTZ79_06g13030	Chr06	20250636	20261155	914	99.5625	7.88	42.28	98.76	-0.037
DTZ79_29g03170	Chr29	4250126	4257668	892	98.8155	6.99	29.58	104.35	-0.04
DTZ79_25g11430	Chr25	22286400	22287883	446	49.5589	6.14	33.52	93.12	-0.055
DTZ79_26g02200	Chr26	6874807	6877795	379	41.7062	4.88	26.5	101.27	0.061
DTZ79_17g08420	Chr17	15580221	15581891	310	35.0096	5.15	43.63	106.9	-0.104
DTZ79_27g00630	Chr27	606905	608545	468	52.0773	5.13	37.3	100.6	-0.119
DTZ79_12g01710	Chr12	2021350	2022595	395	43.002	5.65	41.25	94.25	-0.085
DTZ79_14g10430	Chr14	16738679	16739758	169	18.7706	4.8	27.46	101.54	0.138
DTZ79_12g08720	Chr12	14920552	14923107	828	90.9293	5.48	34.54	108.32	0.035
DTZ79_16g10190	Chr16	13122771	13126010	278	31.0736	5.54	25.3	107.63	0.105
DTZ79_12g09660	Chr12	17185692	17187652	622	66.8137	7.87	33.96	106.41	0.165
DTZ79_16g10150	Chr16	13019940	13022261	202	21.5912	4.61	47.95	93.12	-0.038
DTZ79_15g02040	Chr15	2726296	2732403	296	32.5213	6.18	41.3	102.8	-0.13
DTZ79_27g03740	Chr27	3760959	3763205	139	15.3207	6.27	40.27	96.12	-0.044
DTZ79_22g12810	Chr22	22412292	22412692	131	14.4717	9.07	28.13	93.82	-0.139
DTZ79_28g08840	Chr28	13809813	13811123	433	48.0928	6.56	37.39	103.12	-0.117
DTZ79_25g08710	Chr25	18483718	18491310	587	67.5758	9.92	54.33	105.96	-0.24
DTZ79_08g00860	Chr08	1104995	1108554	513	56.683	5.55	37.33	87	-0.17
DTZ79_01g14500	Chr01	23180808	23188505	710	79.1363	10.03	35.85	93.34	-0.162
DTZ79_21g11110	Chr21	16648835	16652654	432	48.0067	5.94	51.73	98.47	-0.292
DTZ79_17g03480	Chr17	4798680	4800683	110	12.5787	6.57	44.52	108.09	0.16
DTZ79_20g02790	Chr20	3565144	3566845	323	35.6424	10.16	57.27	79.13	-0.464
DTZ79_10g07310	Chr10	15109011	15109539	162	17.7686	9.03	34.2	108.4	0.051
DTZ79_26g12390	Chr26	20184729	20186026	215	23.3665	12.11	52.03	103.49	-0.009
DTZ79_22g11130	Chr22	20602419	20604663	639	71.3852	5.8	33.49	104.77	-0.115
DTZ79_29g13130	Chr29	22236632	22238265	158	18.2557	8.2	48.36	63.67	-0.307
DTZ79_16g13430	Chr16	28701449	28705000	371	41.0048	5	35.73	104.07	0.051
DTZ79_29g00100	Chr29	339706	350199	1141	127.795	8.47	42.75	98.63	-0.102
DTZ79_29g13140	Chr29	22238277	22240206	542	60.0439	7.21	36.66	107.71	0.008
DTZ79_19g01800	Chr19	8287814	8290542	401	43.5966	9.21	44.46	90.7	-0.096
DTZ79_12g08750	Chr12	14950203	14950624	129	14.9199	5.84	46.92	92.25	-0.25
DTZ79_12g01940	Chr12	2230979	2235076	359	40.3708	4.65	53.12	111.03	-0.188
DTZ79_22g11190	Chr22	20629231	20630578	447	50.2825	5.85	31.33	108.34	-0.053
DTZ79_09g13020	Chr09	18937689	18940316	738	83.3239	5.37	37.11	96.38	-0.043
DTZ79_19g01780	Chr19	8258380	8259553	303	32.5701	9.02	48.04	97.52	0.046
DTZ79_12g13350	Chr12	24228087	24236819	556	60.6952	7.62	44.22	88.54	-0.292
DTZ79_09g04530	Chr09	5177868	5181075	663	73.4447	8.72	36.62	100.14	-0.082
DTZ79_01g01320	Chr01	1562351	1564190	459	48.7165	7.5	47.81	90.81	0.127
DTZ79_22g11200	Chr22	20630717	20631899	271	30.4377	6.65	40.8	96.42	-0.121
DTZ79_11g03690	Chr11	4329676	4330807	330	35.8231	8.3	33.65	106.42	0.098
DTZ79_29g13570	Chr29	22953711	22955456	582	64.3428	6.24	38.64	99.62	-0.064
DTZ79_29g01750	Chr29	2640532	2642359	573	63.0247	6.04	32.43	109.72	0.018
DTZ79_22g07260	Chr22	15784379	15793772	249	26.2903	5.35	41.06	83.78	-0.172
DTZ79_27g10700	Chr27	17652566	17662451	330	37.4145	8.68	42.99	111.88	-0.015
DTZ79_16g10100	Chr16	12967502	12968562	175	19.1349	6.71	22.06	91.31	0.108
DTZ79_10g07230	Chr10	14979526	14991173	926	102.437	5.78	40.17	110.26	0.093
DTZ79_09g02860	Chr09	3207006	3216917	851	95.0488	5.09	37.42	98.48	-0.094
DTZ79_09g02930	Chr09	3327262	3334422	998	112.389	5.66	35.37	105.26	-0.031
DTZ79_26g05750	Chr26	11702847	11708121	410	45.7533	8.71	32.71	109.27	0.222
DTZ79_00g01700	Chr00	3051700	3054772	323	36.8606	6.23	29.54	109.44	-0.038
DTZ79_29g08030	Chr29	13180512	13182428	601	64.8761	8.7	75	66.86	-0.334
