# Supplementary material for: Genome-Wide Identification and Expression Analysis of Kiwifruit Leucine-Rich Repeat Receptor-Like Proteins Reveal Their Roles in Biotic and Abiotic Stress Responses
Source: Int J Mol Sci. 2024 Apr 19;25(8):4497. doi: 10.3390/ijms25084497 (PMC11050117; doi:10.3390/ijms25084497)
Supplement: Supplementary file 1 [file ijms-25-04497-s001.zip › Table S3.xlsx]

## Sheet: Sheet1
Table S3. Detailed information for LRR-RLP genes in the Actinidia chinensis 'Red5' genome.
Sequence ID	Chromosome	Start position	End position	Number of Amino Acid	Molecular Weight	Theoretical pI	Instability Index	Aliphatic Index	Grand Average of Hydropathicity
Acc00508	LG01	7306604	7307710	267	28.3067	7.58	33.07	112.13	0.177
Acc00565	LG01	8637481	8639265	438	48.2426	8.55	44.23	90.62	-0.126
Acc00694	LG01	10837273	10839606	724	80.5867	5.8	34.92	97.96	-0.027
Acc00695	LG01	10849870	10859716	669	75.3603	5.06	50.43	89.63	-0.349
Acc00722	LG01	11265484	11268109	486	53.1772	8.66	35.68	96.07	-0.076
Acc00852	LG01	13553286	13557469	709	77.9776	5.36	30.32	105.87	0.041
Acc00890	LG01	14073222	14077812	347	39.0442	8.68	43.53	103.57	-0.217
Acc01048	LG01	16006570	16008743	644	69.7274	9.22	33.57	105.64	-0.004
Acc01049	LG01	16010840	16013076	642	69.5171	9.23	33.2	105.2	-0.005
Acc01810	LG02	4639923	4645895	1068	118.244	5.34	38.82	105.96	0.065
Acc01811	LG02	4650785	4654673	681	75.2077	5.11	43.62	92.73	-0.052
Acc02009	#N/A	#N/A	#N/A	305	33.0307	5.02	36.4	98.03	-0.074
Acc02143	LG02	8167638	8168946	159	18.0437	6.1	48.76	95.03	-0.015
Acc03000	LG03	4486416	4490829	1067	117.668	8.24	35.2	103.69	0.091
Acc03001	LG03	4493602	4497414	1180	129.924	5.85	37.94	97.95	0.063
Acc03124	LG03	5878129	5881385	368	41.0607	4.81	36.69	88.21	-0.002
Acc03461	LG03	8457847	8461579	999	110.403	6.3	37.92	107.4	0.072
Acc03653	LG03	10734439	10735779	400	44.4781	5.75	33.86	111.85	0.125
Acc04972	#N/A	#N/A	#N/A	1135	123.961	9.21	35.97	112.61	-0.009
Acc05127	LG04	12593738	12595278	484	52.7571	8.89	24.8	104.55	0.074
Acc05321	LG05	4074886	4078314	571	63.4144	5.81	46.51	100.07	-0.261
Acc05492	LG05	7784586	7788581	1039	114.116	8.85	35.78	107.47	0.1
Acc06140	LG06	1549151	1552384	213	23.645	5.24	37.05	98.36	-0.109
Acc06288	LG06	2627578	2629750	654	71.5292	7.98	34.87	107.45	-0.072
Acc06377	LG06	4427119	4433427	350	39.7349	8.53	39.81	108	-0.072
Acc06543	LG06	10869333	10875329	201	22.3018	6.43	45.47	102.74	0.101
Acc06988	LG06	15280416	15282901	751	80.2904	8.63	77.47	72.8	-0.407
Acc08290	LG07	19057298	19061465	213	23.6982	5.46	30.13	101.13	-0.11
Acc08819	LG08	7797039	7800243	997	110.74	4.76	36.24	105.25	0.002
Acc08821	LG08	7831993	7834183	623	69.0881	5.55	45.8	100.14	-0.089
Acc09285	LG08	19134725	19137983	1041	114.689	5.57	30.04	100.17	-0.066
Acc09317	LG08	19713240	19714557	364	38.7385	5.86	32.44	101.57	0.131
Acc09782	LG09	314125	319369	349	39.5361	9.22	47.79	102.72	-0.224
Acc09872	LG09	1298815	1300186	384	41.9638	4.7	40.85	95.18	0.035
Acc10059	LG09	3481299	3498196	1124	127.274	5.28	38.29	103.37	-0.048
Acc10060	LG09	3520622	3532989	1012	114.727	5.67	37.51	99.07	-0.061
Acc10067	LG09	3627744	3634677	107	11.7413	4.19	47.87	112.9	-0.021
Acc10415	LG09	8803049	8804407	421	45.6259	4.92	31.44	92.4	0.066
Acc11475	LG10	11919400	11928741	763	84.1273	6.21	34.16	114.89	0.176
Acc12530	LG11	11996646	11998289	438	48.8709	6.63	44.61	87.24	-0.205
Acc13043	LG12	1722526	1724041	414	45.0537	5.34	35.38	103.55	0.019
Acc13063	LG12	1930761	1934808	335	37.8097	4.53	52.93	106.48	-0.278
Acc13131	LG12	2896975	2898126	327	36.1496	8.85	30.93	100.46	-0.017
Acc13251	LG12	4991149	4997440	221	24.1446	5.75	27.43	114.57	-0.005
Acc13584	LG12	12310202	12313490	969	107.002	5.5	38.71	105.43	-0.006
Acc13854	LG12	18614125	18615547	401	44.0721	6.29	41.61	93.89	0.006
Acc13943	LG12	18060391	18062079	461	50.0657	8.05	43.54	101.06	0.055
Acc14222	LG13	2762587	2765789	330	36.8923	5.43	39.39	108.67	-0.181
Acc16306	LG14	16868422	16870292	198	21.743	9.05	26.25	104.85	-0.006
Acc16788	LG15	7161681	7173132	584	63.9001	5.96	50.23	117.21	-0.013
Acc16812	LG15	7623882	7627384	644	69.7338	9.38	36.28	117.92	0.194
Acc17095	LG15	10428388	10429789	364	38.8587	6.05	34.41	104.26	0.143
Acc17808	LG16	2604042	2605741	449	49.3855	5.43	35.61	106.15	-0.088
Acc17862	LG16	3167618	3169321	503	55.7633	6.56	38.99	100.16	-0.025
Acc18119	LG16	5706830	5710231	967	105.93	5.52	30.97	109.66	0.021
Acc18359	LG16	8805815	8808179	285	31.2957	8.39	27.41	99.82	-0.052
Acc18523	LG16	12411376	12417376	481	53.1459	9.51	43.47	118.17	0.123
Acc18546	LG16	12890329	12901407	1055	117.243	4.87	33.92	98.38	0.04
Acc18550	LG16	12978602	12983369	1133	128.964	6.38	36.46	98.67	-0.102
Acc18876	LG17	632181	634285	514	55.9454	7.54	41.28	99.53	0.063
Acc19015	LG17	2472885	2481147	688	75.381	7.67	55.29	83.44	-0.441
Acc20892	LG18	19620786	19623864	740	81.9825	5.7	33.45	109.57	0.126
Acc21096	LG19	7023559	7024937	391	42.5045	9.11	43	96.27	-0.01
Acc21378	LG19	13301172	13303137	455	48.1053	9.02	45.85	99.25	0.017
Acc21913	LG23	14638373	14648183	261	29.384	6.45	45.13	106.4	-0.265
Acc22028	LG23	15874578	15879752	516	57.3815	4.77	50.8	105.99	-0.238
Acc22154	LG23	17240381	17253639	564	61.5435	6.16	38.59	109.24	-0.053
Acc23067	LG20	12267236	12275908	213	23.2386	5.62	25.2	112.91	-0.053
Acc23297	LG20	16278371	16279883	414	44.484	5.36	33.59	99.81	-0.016
Acc23599	LG21	1883032	1884567	443	48.6186	5.65	35.89	102.14	-0.008
Acc24314	LG21	14157115	14160532	571	63.5335	6.17	47.98	99.05	-0.305
Acc24937	LG22	11334601	11336143	434	47.784	6.07	45.43	95.92	0.019
Acc25328	LG22	17639952	17643132	920	102.865	6.55	33.46	106.98	-0.058
Acc25329	LG22	17658758	17661602	905	100.184	5.95	36.87	105.73	-0.055
Acc25330	LG22	17670458	17673438	816	91.5854	7	37.74	98.86	-0.168
Acc25331	LG22	17676378	17678018	519	58.1674	6.12	30	106.45	-0.052
Acc26620	LG23	23261003	23263703	463	51.6524	5.95	32.57	92.81	-0.023
Acc26673	LG23	23916208	23921353	77	8.90831	8.29	49.24	83.51	-0.232
Acc26678	LG23	23970419	23977984	710	77.8566	8.04	36.01	98.72	0.084
Acc26771	LG23	24984840	24986327	292	32.6185	5.13	43.92	115.48	-0.063
Acc27351	LG24	4397452	4398951	408	44.4792	4.97	57.33	87.72	-0.049
Acc27371	LG24	4705521	4717685	622	67.7909	9.35	44.09	115.24	0.185
Acc27896	LG24	13600600	13601463	155	17.6694	7.65	44.65	84.26	0.015
Acc28059	#N/A	#N/A	#N/A	381	41.9189	6.45	37.75	104.7	0.083
Acc28060	LG24	15213034	15219196	1053	116.657	5.12	37.79	103.4	0.012
Acc28252	LG25	2910306	2912564	596	65.3342	8.99	35.67	103.72	-0.035
Acc28557	LG25	10182937	10186047	476	52.3271	5.74	39.56	100.32	0.018
Acc29424	LG26	6602061	6605353	540	59.6367	5.31	45.68	102.37	-0.16
Acc29772	LG26	11361357	11364795	970	106.25	5.88	31.75	108.7	-0.017
Acc29959	LG26	13836567	13838162	453	49.5338	5.22	34.94	100	0.064
Acc29982	LG26	14323422	14325182	452	49.3736	4.99	37.42	98.72	0.087
Acc30038	LG26	14996678	15001408	499	56.1916	9.34	35.82	94.91	-0.659
Acc30286	LG26	17843395	17852389	328	35.3558	5.56	33.16	113.41	0.258
Acc30415	LG26	19440487	19441960	363	39.3466	8.83	35.07	105.67	0.16
Acc30472	#N/A	#N/A	#N/A	809	89.7272	5.17	43.24	104.83	0.035
Acc30535	#N/A	#N/A	#N/A	866	95.7447	6.92	39.75	103.21	-0.038
Acc31479	LG27	19822353	19830223	328	37.1982	8.54	37.41	110.79	-0.005
Acc31883	LG28	6854590	6859496	384	41.7739	9.32	53.33	103.28	0.042
Acc32004	LG28	8771481	8773479	473	51.0313	5.43	45.78	103.68	-0.008
Acc32146	LG28	10651621	10655315	750	82.385	6.08	32.26	110.97	0.025
Acc32284	LG28	12281888	12286714	1138	128.153	5.5	34.82	98.65	-0.146
Acc32474	LG28	14628998	14630326	363	39.5427	8.52	34.42	102.98	0.14
Acc32621	LG29	1055323	1060797	1041	116.164	8.75	35.25	97.65	-0.062
Acc32892	LG29	6392344	6396271	479	52.6865	6.26	33.99	102.32	0.049
Acc33226	LG29	13970498	13972943	635	68.3959	8.52	79.07	64.5	-0.399
