# Supplementary material for: Genome-Wide Identification and Expression Analysis of Kiwifruit Leucine-Rich Repeat Receptor-Like Proteins Reveal Their Roles in Biotic and Abiotic Stress Responses
Source: Int J Mol Sci. 2024 Apr 19;25(8):4497. doi: 10.3390/ijms25084497 (PMC11050117; doi:10.3390/ijms25084497)
Supplement: Supplementary file 1 [file ijms-25-04497-s001.zip › Table S4.xlsx]

## Sheet: Sheet1
Table S4. The Ka/Ks results for LRR-RLP collinear pairs between Arabidopsis and kiwifruit.
Seq_1	Seq_2	Ka	Ks	Ka_Ks	EffectiveLen	AverageS-sites	AverageN-sites	cN	cS	pN	pS	Note
AT1G80080	Actinidia01743.t1	0.359513	NaN	NaN	1062	255.25	806.75	230.417	198.583	0.285611	0.777995	High Sequence Divergence Value (pS>=0.75)
AT2G42800	Actinidia12818.t1	0.297484	NaN	NaN	1017	245.667	771.333	189.417	190.583	0.24557	0.77578	High Sequence Divergence Value (pS>=0.75)
AT3G11080	Actinidia20749.t1	0.601325	NaN	NaN	2592	602.75	1989.25	822.75	500.25	0.413598	0.829946	High Sequence Divergence Value (pS>=0.75)
AT3G11080	Actinidia11565.t1	0.615293	NaN	NaN	2628	610	2018	847.167	479.833	0.419805	0.786612	High Sequence Divergence Value (pS>=0.75)
AT3G11080	Actinidia29086.t1	0.609882	NaN	NaN	2595	607.167	1987.83	829.75	478.25	0.417414	0.787675	High Sequence Divergence Value (pS>=0.75)
AT5G25910	Actinidia30289.t1	0.595798	2.164	0.275323	1821	428.833	1392.17	572.333	303.667	0.41111	0.708123
AT1G80080	DTZ79_16g03330	0.29978	NaN	NaN	1395	341.5	1053.5	260.333	274.667	0.247113	0.804295	High Sequence Divergence Value (pS>=0.75)
AT2G42800	DTZ79_17g00870	0.322699	NaN	NaN	1329	322	1007	264.083	245.917	0.262248	0.763716	High Sequence Divergence Value (pS>=0.75)
AT3G49750	DTZ79_01g06070	0.266645	2.19608	0.121419	570	148.5	421.5	94.5833	105.417	0.224397	0.709877
AT5G65830	DTZ79_01g06070	0.324928	NaN	NaN	591	149.833	441.167	116.333	116.667	0.263695	0.778643	High Sequence Divergence Value (pS>=0.75)
AT1G80080	Acc12530	0.358043	NaN	NaN	1284	310.167	973.833	277.25	250.75	0.2847	0.808436	High Sequence Divergence Value (pS>=0.75)
AT1G80080	Acc17862	0.325984	NaN	NaN	1467	357.167	1109.83	293.417	294.583	0.264379	0.824778	High Sequence Divergence Value (pS>=0.75)
AT2G42800	Acc13943	0.300989	NaN	NaN	1350	327.167	1022.83	253.583	248.417	0.247922	0.759297	High Sequence Divergence Value (pS>=0.75)
AT2G42800	Acc18876	0.308112	NaN	NaN	1347	324.25	1022.75	258.417	247.583	0.252668	0.763557	High Sequence Divergence Value (pS>=0.75)
AT3G11080	Acc01810	0.626238	NaN	NaN	2625	613.25	2011.75	854.167	464.833	0.424589	0.757983	High Sequence Divergence Value (pS>=0.75)
AT3G11080	Acc03000	0.619175	NaN	NaN	2595	600.583	1994.42	840.667	465.333	0.42151	0.774802	High Sequence Divergence Value (pS>=0.75)
AT3G49750	Acc00508	0.253569	2.02917	0.124962	798	200.75	597.25	128.5	140.5	0.215153	0.699875
AT4G13810	Acc08819	0.712581	3.20833	0.222104	1962	452.5	1509.5	694.333	334.667	0.459976	0.739595
AT4G18760	Acc21378	0.349006	1.495	0.233449	1275	328.667	946.333	264.083	212.917	0.27906	0.647819
AT5G45770	Acc21378	0.45812	1.69792	0.269812	1224	304.917	919.083	315.083	204.917	0.342823	0.672042
AT5G65830	Acc00508	0.280224	NaN	NaN	798	196.417	601.583	140.667	147.333	0.233827	0.750106	High Sequence Divergence Value (pS>=0.75)
