# Supplementary material for: Genome-Wide Identification and Expression Analysis of Kiwifruit Leucine-Rich Repeat Receptor-Like Proteins Reveal Their Roles in Biotic and Abiotic Stress Responses
Source: Int J Mol Sci. 2024 Apr 19;25(8):4497. doi: 10.3390/ijms25084497 (PMC11050117; doi:10.3390/ijms25084497)
Supplement: Supplementary file 1 [file ijms-25-04497-s001.zip › Table S5.xlsx]

## Sheet: Sheet1
Table S5. The Ka/Ks results for LRR-RLP collinear pairs between different species kiwifruit.
Seq_1	Seq_2	Ka	Ks	Ka_Ks	EffectiveLen	AverageS-sites	AverageN-sites	cN	cS	pN	pS	Note
DTZ79_01g10100	Actinidia38507.t1	0.0302204	0.0927463	0.325839	972	229.25	742.75	22	20	0.0296197	0.087241
DTZ79_03g02550	Actinidia01003.t1	0.0819082	0.122967	0.666101	837	196.917	640.083	49.6667	22.3333	0.0775941	0.113415
DTZ79_05g01810	Actinidia17147.t1	0.00289436	0.0407571	0.0710149	447	100.833	346.167	1	4	0.00288878	0.0396694
DTZ79_06g00570	Actinidia34011.t1	0.059317	0.161222	0.367922	564	134.417	429.583	24.5	19.5	0.057032	0.145071
DTZ79_06g00570	Actinidia09613.t3	0.484253	2.11892	0.228537	582	138.667	443.333	158.167	97.8333	0.356767	0.705529
DTZ79_06g04390	Actinidia28633.t1	0.0404101	0.0860088	0.469837	828	201	627	24.6667	16.3333	0.0393408	0.0812604
DTZ79_06g04390	Actinidia12325.t1	0.0204931	0.125666	0.163075	984	242	742	15	28	0.0202156	0.115702
DTZ79_06g04390	Actinidia19010.t2	0.117242	1.50041	0.0781397	984	239.25	744.75	80.8333	155.167	0.108538	0.648555
DTZ79_06g13030	Actinidia22542.t1	0.386706	2.10869	0.183387	1905	472.75	1432.25	432.75	333.25	0.302147	0.704918
DTZ79_07g13270	Actinidia09613.t3	0.0330075	0.049687	0.664307	636	156	480	15.5	7.5	0.0322917	0.0480769
DTZ79_08g00860	Actinidia07941.t1	0.179141	0.268963	0.666044	888	202.417	685.583	109.25	45.75	0.159353	0.226019
DTZ79_08g05470	Actinidia33174.t1	0.124834	0.202199	0.617381	1545	358.75	1186.25	136.417	63.5833	0.114998	0.177236
DTZ79_09g01280	Actinidia17505.t1	0.214291	0.993114	0.215777	1152	269.917	882.083	164.417	148.583	0.186396	0.550479
DTZ79_09g01280	Actinidia32643.t1	0.00975835	0.0416622	0.234226	1008	234.417	773.583	7.5	9.5	0.00969514	0.0405261
DTZ79_09g01280	Actinidia39770.t1	0.229541	1.21489	0.188939	1098	257.25	840.75	166.25	154.75	0.19774	0.601555
DTZ79_09g02720	Actinidia21924.t1	0.425049	1.68093	0.252866	1050	232.25	817.75	265.333	155.667	0.324468	0.670255
DTZ79_09g02720	Actinidia26343.t1	0.192285	0.256507	0.749628	1122	245.5	876.5	148.667	53.3333	0.169614	0.217244
DTZ79_09g02970	Actinidia23544.t1	0.130153	0.20632	0.63083	1626	356.667	1269.33	151.667	64.3333	0.119485	0.180374
DTZ79_12g01710	Actinidia17505.t1	0.205117	0.404614	0.506944	1116	268.083	847.917	152.167	83.8333	0.179459	0.312714
DTZ79_12g01710	Actinidia32643.t1	0.385118	1.17877	0.326712	939	222.417	716.583	215.833	132.167	0.301198	0.59423
DTZ79_12g01710	Actinidia39770.t1	0.214666	0.333555	0.643571	1047	248.833	798.167	149	67	0.186678	0.269257
DTZ79_12g04680	Actinidia37858.t1	0.0156314	0.051177	0.305438	594	141.5	452.5	7	7	0.0154696	0.04947
DTZ79_12g09660	Actinidia09694.t1	0.0985468	0.144988	0.679687	1503	359.667	1143.33	105.583	47.4167	0.0923469	0.131835
DTZ79_13g03290	Actinidia08137.t1	0.0158579	0.0410593	0.386219	990	225.25	764.75	12	9	0.0156914	0.0399556
DTZ79_13g06460	Actinidia21924.t1	0.0114902	0.0561155	0.204761	1473	332.917	1140.08	13	18	0.0114027	0.0540676
DTZ79_15g05460	Actinidia05212.t1	0.0207385	0.0472256	0.439137	1611	396.917	1214.08	24.8333	18.1667	0.0204544	0.0457695
DTZ79_16g03330	Actinidia01743.t1	0.0399222	0.120257	0.331974	1023	238.5	784.5	30.5	26.5	0.0388783	0.111111
DTZ79_16g10150	Actinidia21924.t1	0.233805	0.601617	0.388627	594	134.75	459.25	92.25	55.75	0.200871	0.413729
DTZ79_17g00870	Actinidia12818.t1	0.0527631	0.138137	0.381962	1023	251	772	39.3333	31.6667	0.0509499	0.126162
DTZ79_18g03550	Actinidia14536.t1	0.0163377	0.0225369	0.724931	1536	360.333	1175.67	19	8	0.016161	0.0222017
DTZ79_19g11450	Actinidia35026.t1	0.00496554	0.0406682	0.122099	783	176.833	606.167	3	7	0.00494913	0.0395853
DTZ79_21g04410	Actinidia10182.t1	0.105837	0.140559	0.752974	852	200.25	651.75	64.3333	25.6667	0.0987086	0.128173
DTZ79_21g11110	Actinidia17147.t1	0.0258925	0.127721	0.202728	408	93.6667	314.333	8	11	0.0254507	0.117438
DTZ79_21g11110	Actinidia17147.t1	0.0258925	0.127721	0.202728	408	93.6667	314.333	8	11	0.0254507	0.117438
DTZ79_23g13430	Actinidia18947.t1	0.0159084	0.0540775	0.294178	951	220.417	730.583	11.5	11.5	0.0157408	0.0521739
DTZ79_24g09740	Actinidia31656.t1	0.0273171	0.0327921	0.83304	429	93.5	335.5	9	3	0.0268256	0.0320856
DTZ79_25g01230	Actinidia37488.t1	0.0379064	0.186328	0.203439	777	181.833	595.167	22	30	0.0369644	0.164986
DTZ79_26g02360	Actinidia09221.t1	0.0277629	0.0623527	0.445256	1470	335.667	1134.33	30.9167	20.0833	0.0272554	0.0598312
DTZ79_26g12390	Actinidia36720.t1	0.428443	1.15348	0.371434	621	165	456	148.833	97.1667	0.326389	0.588889
DTZ79_26g12390	Actinidia06882.t1	0.174978	0.227562	0.768923	612	161.333	450.667	70.3333	31.6667	0.156065	0.196281
DTZ79_27g05760	Actinidia12020.t1	0.131533	0.321834	0.408699	1326	333.417	992.583	119.75	87.25	0.120645	0.261685
DTZ79_27g10700	Actinidia12325.t1	0.042483	0.0630494	0.673806	912	226	686	28.3333	13.6667	0.0413022	0.060472
DTZ79_29g05070	Actinidia13689.t1	0.0748936	0.105622	0.709069	1428	338.333	1089.67	77.6667	33.3333	0.0712756	0.0985222
DTZ79_29g05070	Actinidia18947.t1	0.236783	2.06313	0.114768	915	214.833	700.167	142.167	150.833	0.203047	0.702095
DTZ79_29g08030	Actinidia02532.t1	0.0395309	0.0591563	0.668245	1785	449.75	1335.25	51.4167	25.5833	0.0385071	0.0568835
Actinidia34011.t1	Acc08290.1	0.475063	2.42832	0.195634	573	136.583	436.417	153.583	98.4167	0.351919	0.720561
DTZ79_01g06070	Acc00508	0.0559871	0.115613	0.484263	585	158.667	426.333	23	17	0.0539484	0.107143
DTZ79_01g06640	Acc00565	0.0506476	0.113692	0.445479	1263	303.333	959.667	47	32	0.0489753	0.105495
DTZ79_01g10100	Acc00890	0.0135597	0.067971	0.199492	975	230.833	744.167	10	15	0.0134378	0.0649819
DTZ79_01g10100	Acc09782	0.0332313	0.196546	0.169076	978	229.417	748.583	24.3333	39.6667	0.0325058	0.172902
DTZ79_05g01810	Acc24314	0.0361486	0.140671	0.256973	1350	315.75	1034.25	36.5	40.5	0.0352913	0.128266
DTZ79_05g01810	Acc05321	0.00973013	0.0390226	0.249346	1350	315.583	1034.42	10	12	0.00966728	0.0380248
DTZ79_06g00570	Acc16306	0.059317	0.161222	0.367922	564	134.417	429.583	24.5	19.5	0.057032	0.145071
DTZ79_06g03530	Acc06288	0.0117035	0.0439928	0.266033	1932	468.083	1463.92	17	20	0.0116127	0.0427274
DTZ79_06g04390	Acc26673	0.0763495	2.79487	0.0273177	231	51.9167	179.083	13	38	0.0725919	0.731942
DTZ79_06g04390	Acc31479	0.0204931	0.120796	0.16965	984	242	742	15	27	0.0202156	0.11157
DTZ79_06g04390	Acc06377	0.00337382	0.0404353	0.0834376	984	241.333	742.667	2.5	9.5	0.00336625	0.0393646
DTZ79_07g13270	Acc06140	0.0529187	0.143964	0.367582	636	156.5	479.5	24.5	20.5	0.0510949	0.13099
DTZ79_07g13270	Acc08290	0.0351752	0.049742	0.707153	636	155.833	480.167	16.5	7.5	0.0343631	0.0481283
DTZ79_09g01280	Acc13043	0.212691	1.00502	0.211628	1146	268.083	877.917	162.583	148.417	0.185192	0.553621
DTZ79_09g01280	Acc23297	0.213409	0.96255	0.221713	1155	270.667	884.333	164.25	146.75	0.185733	0.54218
DTZ79_09g01280	Acc09872	0.0108295	0.0401754	0.269555	1152	268.417	883.583	9.5	10.5	0.0107517	0.0391183
DTZ79_09g02720	Acc10059	0.172878	0.263875	0.655153	1098	242	856	132.167	53.8333	0.1544	0.222452
DTZ79_09g13020	Acc10059	0.106868	0.154117	0.693422	2214	490.5	1723.5	171.667	68.3333	0.0996035	0.139314
DTZ79_10g03760	Acc06988	0.267421	1.07327	0.249166	1875	475	1400	314.917	271.083	0.22494	0.570702
DTZ79_10g07230	Acc11475	0.039686	0.0670917	0.591519	2106	493.417	1612.58	62.3333	31.6667	0.0386543	0.0641783
DTZ79_12g01710	Acc13043	0.134369	0.2327	0.577434	1146	272.833	873.167	107.417	54.5833	0.12302	0.200061
DTZ79_12g01710	Acc23297	0.173758	0.348704	0.498298	1131	271.333	859.667	133.333	75.6667	0.155099	0.27887
DTZ79_12g01710	Acc09872	0.364286	1.05983	0.343722	1056	252	804	232	143	0.288557	0.56746
DTZ79_12g01940	Acc13063	0.00975624	0.0654797	0.148996	1005	231.25	773.75	7.5	14.5	0.00969305	0.0627027
DTZ79_12g02890	Acc13131	0.0258577	0.142423	0.181555	561	141.333	419.667	10.6667	18.3333	0.025417	0.129717
DTZ79_12g04680	Acc13251	0.0156314	0.051177	0.305438	594	141.5	452.5	7	7	0.0154696	0.04947
DTZ79_12g04680	Acc23067	0.03294	0.146111	0.225445	570	135.583	434.417	14	18	0.0322271	0.13276
DTZ79_12g08720	Acc13584	0.010492	0.0373845	0.280651	2484	580.417	1903.58	19.8333	21.1667	0.0104189	0.0364681
DTZ79_13g03290	Acc14222	0.0171889	0.0411062	0.41816	990	225	765	13	9	0.0169935	0.04
DTZ79_13g03290	Acc22028	0.255092	NaN	NaN	948	222.333	725.667	156.917	167.083	0.216238	0.751499	High Sequence Divergence Value (pS>=0.75)
DTZ79_13g06460	Acc10059	0.380824	1.77306	0.214784	3075	676.75	2398.25	716.167	459.833	0.298621	0.679473
DTZ79_15g05460	Acc16788	0.0215827	0.0472461	0.456815	1611	396.75	1214.25	25.8333	18.1667	0.0212751	0.0457887
DTZ79_16g03330	Acc12530	0.109512	0.383775	0.285355	1257	296.833	960.167	97.8333	89.1667	0.101892	0.300393
DTZ79_16g03330	Acc17862	0.0154874	0.0898475	0.172375	1413	336.583	1076.42	16.5	28.5	0.0153286	0.0846744
DTZ79_16g10390	Acc18523	0.0407851	0.0842277	0.484224	387	91	296	11.75	7.25	0.0396959	0.0796703
DTZ79_17g00870	Acc13943	0.0663611	0.201792	0.328858	1371	334.417	1036.58	65.8333	59.1667	0.0635099	0.176925
DTZ79_17g00870	Acc18876	0.0342392	0.0854849	0.40053	1377	336.25	1040.75	34.8333	27.1667	0.0334695	0.0807931
DTZ79_19g01780	Acc21096	0.0332381	0.0535145	0.621104	909	232.333	676.667	22	12	0.0325123	0.0516499
DTZ79_19g11450	Acc21913	0.00496554	0.0406682	0.122099	783	176.833	606.167	3	7	0.00494913	0.0395853
DTZ79_21g11110	Acc24314	0.0398905	0.0648499	0.61512	1284	305.833	978.167	38	19	0.0388482	0.0621253
DTZ79_21g11110	Acc05321	0.0661998	0.155887	0.424666	1284	305.5	978.5	62	43	0.0633623	0.140753
DTZ79_22g11070	Acc25328	0.161034	0.261598	0.615578	609	141.5	467.5	67.75	31.25	0.14492	0.220848
DTZ79_23g13430	Acc26620	0.00890844	0.0574837	0.154973	1389	316.25	1072.75	9.5	17.5	0.00885574	0.055336
DTZ79_23g13430	Acc32892	0.297588	1.53421	0.193969	1371	319.667	1051.33	258.25	208.75	0.24564	0.653024
DTZ79_23g15270	Acc22028	0.0532901	0.20719	0.257204	1524	367.333	1156.67	59.5	66.5	0.0514409	0.181034
DTZ79_24g03600	Acc27371	0.0232101	0.0267508	0.867642	1014	241	773	17.6667	6.33333	0.0228547	0.0262794
DTZ79_24g09740	Acc27896	0.0194636	0.05139	0.378742	465	100.667	364.333	7	5	0.0192132	0.0496689
DTZ79_24g11220	Acc28060	0.131316	0.230162	0.570537	2904	684.083	2219.92	267.417	135.583	0.120462	0.198197
DTZ79_24g11220	Acc03461	0.376792	1.25549	0.300114	2823	670.083	2152.92	637.667	408.333	0.296187	0.609377
DTZ79_25g00050	Acc28252	0.0110547	0.0290535	0.380494	1788	421.083	1366.92	15	12	0.0109736	0.0284979
DTZ79_25g03640	Acc28557	0.0148715	0.0421692	0.352663	1428	341.417	1086.58	16	14	0.0147251	0.0410056
DTZ79_25g03640	Acc32892	0.181755	0.587548	0.309345	1410	335.083	1074.92	173.5	136.5	0.161408	0.407361
DTZ79_26g02360	Acc29424	0.0274263	0.0583387	0.470122	1488	340	1148	30.9167	19.0833	0.0269309	0.0561275
DTZ79_26g12390	Acc17095	0.363312	1.22639	0.296245	597	161.75	435.25	125.333	97.6667	0.287957	0.603812
DTZ79_26g12390	Acc30415	0.174978	0.236005	0.741416	612	161.333	450.667	70.3333	32.6667	0.156065	0.202479
DTZ79_26g12390	Acc32474	0.195572	0.383291	0.510244	612	161.333	450.667	77.5833	48.4167	0.172152	0.300103
DTZ79_26g12390	Acc09317	0.428443	1.12579	0.380571	621	165	456	148.833	96.1667	0.326389	0.582828
DTZ79_27g10700	Acc31479	0.042483	0.0678777	0.625876	912	226	686	28.3333	14.6667	0.0413022	0.0648968
DTZ79_28g08830	Acc32146	0.0759128	0.135435	0.560511	909	219.917	689.083	49.75	27.25	0.0721974	0.123911
DTZ79_28g10180	Acc32284	0.131159	0.198629	0.660323	2208	485.667	1722.33	207.25	84.75	0.120331	0.174502
DTZ79_29g00630	Acc32621	0.221141	0.382042	0.578841	1797	425.083	1371.92	262.75	127.25	0.19152	0.299353
DTZ79_29g05070	Acc26620	0.354217	2.1353	0.165886	1317	306.917	1010.08	285.167	216.833	0.28232	0.706489
DTZ79_29g05070	Acc28557	0.245108	0.714455	0.34307	1413	336.083	1076.92	225.167	154.833	0.209085	0.460699
DTZ79_29g05070	Acc32892	0.0769183	0.10565	0.728046	1428	338.25	1089.75	79.6667	33.3333	0.0731055	0.0985464
DTZ79_29g08030	Acc33226	0.025186	0.0419847	0.599885	1803	457.167	1345.83	33.3333	18.6667	0.0247678	0.0408312
