# Supplementary material for: Genome-Wide Identification and Expression Analysis of Kiwifruit Leucine-Rich Repeat Receptor-Like Proteins Reveal Their Roles in Biotic and Abiotic Stress Responses
Source: Int J Mol Sci. 2024 Apr 19;25(8):4497. doi: 10.3390/ijms25084497 (PMC11050117; doi:10.3390/ijms25084497)
Supplement: Supplementary file 1 [file ijms-25-04497-s001.zip › Table S6.xlsx]

## Sheet: Sheet1
Table S6. The Ka/Ks results for LRR-RLP duplicate pairs within same kiwifruit genome.
Seq_1	Seq_2	Ka	Ks	Ka_Ks	EffectiveLen	AverageS-sites	AverageN-sites	cN	cS	pN	pS	Duplication types
Actinidia00252.t1	Actinidia15627.t1	0.251946	1.67353	0.150547	345	79.4167	265.583	56.8333	53.1667	0.213994	0.669465	segmental duplication
Actinidia00424.t1	Actinidia03803.t1	0.356708	2.08758	0.170872	1239	296.083	942.917	267.667	208.333	0.283871	0.703631	segmental duplication
Actinidia00527.t1	Actinidia22542.t1	0.376487	2.01466	0.186874	1890	468	1422	420.917	327.083	0.296003	0.698896	segmental duplication
Actinidia01743.t1	Actinidia15759.t1	0.152831	0.562419	0.271738	783	189.333	593.667	82.0833	74.9167	0.138265	0.395687	segmental duplication
Actinidia04858.t1	Actinidia19014.t1	0.262541	1.39339	0.188419	1296	303.583	992.417	219.833	192.167	0.221513	0.632995	segmental duplication
Actinidia05656.t1	Actinidia07604.t1	0.14476	0.696614	0.207805	1986	467.417	1518.58	199.917	212.083	0.131647	0.453735	segmental duplication
Actinidia07941.t1	Actinidia24249.t1	0.463789	1.50192	0.308797	804	184.583	619.417	214.25	119.75	0.34589	0.648758	segmental duplication
Actinidia08839.t1	Actinidia36763.t1	0.174574	0.28238	0.618222	1338	321.917	1016.08	158.25	75.75	0.155745	0.235309	segmental duplication
Actinidia09235.t1	Actinidia19014.t1	0.251687	1.21929	0.206421	1302	302.667	999.333	213.667	182.333	0.213809	0.602423	segmental duplication
Actinidia10252.t1	Actinidia36397.t1	0.736964	2.80625	0.262615	2076	501.333	1574.67	738.917	367.083	0.469253	0.732214	segmental duplication
Actinidia11565.t1	Actinidia29086.t1	0.129138	0.268	0.48186	4638	1085	3553	421.5	244.5	0.118632	0.225346	segmental duplication
Actinidia12020.t1	Actinidia00413.t1	0.375598	1.85954	0.201984	1743	436.583	1306.42	386	300	0.295465	0.687154	segmental duplication
Actinidia12020.t1	Actinidia36464.t1	0.123513	0.328856	0.375585	1653	411.917	1241.08	141.333	109.667	0.113879	0.266235	segmental duplication
Actinidia12118.t1	Actinidia22542.t1	0.80262	NaN	NaN	816	198.083	617.917	304.5	166.5	0.492785	0.840555	segmental duplication
Actinidia12385.t1	Actinidia36636.t1	0.137126	0.154863	0.885464	1032	251.333	780.667	97.8333	35.1667	0.12532	0.13992	segmental duplication
Actinidia12800.t1	Actinidia09694.t1	0.0627303	0.120284	0.521518	1671	401.167	1269.83	76.4167	44.5833	0.0601785	0.111134	segmental duplication
Actinidia12818.t1	Actinidia11188.t1	0.0950813	0.294671	0.322669	1023	250.333	772.667	69	61	0.0893011	0.243675	segmental duplication
Actinidia13955.t1	Actinidia21924.t1	0.225961	0.627579	0.360053	219	49	170	33.1667	20.8333	0.195098	0.42517	segmental duplication
Actinidia14922.t1	Actinidia16684.t1	0.0779204	0.237405	0.328218	1320	319	1001	74.0833	64.9167	0.0740093	0.203501	segmental duplication
Actinidia15333.t1	Actinidia22542.t1	0.115549	0.220691	0.523577	1791	442.417	1348.58	144.417	84.5833	0.107088	0.191185	segmental duplication
Actinidia16402.t1	Actinidia36397.t1	0.162094	0.770889	0.210269	2265	559.167	1705.83	248.667	269.333	0.145774	0.481669	segmental duplication
Actinidia16469.t1	Actinidia03803.t1	0.0673229	0.165129	0.407699	1173	280	893	57.5	41.5	0.0643897	0.148214	segmental duplication
Actinidia16573.t1	Actinidia39479.t1	0.270158	0.767936	0.351797	519	131.083	387.917	88	63	0.226853	0.48061	segmental duplication
Actinidia16573.t1	Actinidia05656.t1	0.0509861	0.228693	0.222946	1845	433.333	1411.67	69.5833	85.4167	0.0492916	0.197115	segmental duplication
Actinidia16764.t1	Actinidia39532.t1	0.15723	0.48691	0.322915	945	217.083	727.917	103.25	77.75	0.141843	0.358157	segmental duplication
Actinidia17505.t1	Actinidia32643.t1	0.205395	1.06083	0.193618	999	233.25	765.75	137.583	132.417	0.179671	0.567703	segmental duplication
Actinidia17505.t1	Actinidia39770.t1	0.0954804	0.300467	0.317773	1167	274.667	892.333	80	68	0.0896526	0.247573	segmental duplication
Actinidia19335.t1	Actinidia33084.t1	0.0508326	0.194089	0.261904	2691	646.167	2044.83	100.5	110.5	0.0491483	0.171009	segmental duplication
Actinidia20749.t1	Actinidia11565.t1	0.228452	0.721829	0.31649	3168	724.333	2443.67	481.25	335.75	0.196938	0.46353	segmental duplication
Actinidia20749.t1	Actinidia29086.t1	0.250262	0.740826	0.337814	3210	736.5	2473.5	526.333	346.667	0.212789	0.470695	segmental duplication
Actinidia22542.t1	Actinidia19176.t1	0.809007	NaN	NaN	960	239.917	720.083	356.417	189.583	0.494966	0.790205	segmental duplication
Actinidia23545.t1	Actinidia38684.t1	0.552473	2.59444	0.212945	711	158.083	552.917	216.167	114.833	0.390957	0.72641	segmental duplication
Actinidia28633.t1	Actinidia12325.t1	0.0557755	0.161697	0.344938	828	201.667	626.333	33.6667	29.3333	0.053752	0.145455	segmental duplication
Actinidia29964.t1	Actinidia38507.t1	0.112882	0.0700899	1.61053	489	112.083	376.917	39.5	7.5	0.104798	0.0669145	segmental duplication
Actinidia30282.t1	Actinidia26065.t1	0.266279	0.469148	0.567581	711	165.583	545.417	122.25	57.75	0.224141	0.348767	segmental duplication
Actinidia32643.t1	Actinidia39770.t1	0.230987	1.27267	0.181498	945	220.25	724.75	144.083	134.917	0.198804	0.612561	segmental duplication
Actinidia33366.t1	Actinidia28886.t1	0.22877	0.463136	0.493958	570	145.667	424.333	83.6667	50.3333	0.197172	0.345538	segmental duplication
Actinidia34011.t1	Actinidia09613.t3	0.471009	2.40628	0.195742	573	136.75	436.25	152.583	98.4167	0.349761	0.719683	segmental duplication
Actinidia35014.t1	Actinidia19014.t1	0.39161	0.926281	0.422777	969	222.167	746.833	227.833	118.167	0.305066	0.531883	segmental duplication
Actinidia36720.t1	Actinidia06882.t1	0.237096	1.0145	0.233706	1092	277.833	814.167	165.5	154.5	0.203275	0.556089	segmental duplication
Actinidia37577.t1	Actinidia30097.t1	0.0369305	0.239642	0.154107	1050	273	777	28	56	0.036036	0.205128	segmental duplication
Actinidia39479.t1	Actinidia10997.t1	0.447343	1.3368	0.334638	519	132.917	386.083	130.083	82.9167	0.336931	0.623824	segmental duplication
Actinidia39479.t1	Actinidia05656.t1	0.241927	0.744633	0.324895	486	122.5	363.5	75.1667	57.8333	0.206786	0.472109	segmental duplication
Actinidia39479.t1	Actinidia11114.t1	0.445115	1.06876	0.416479	507	131.667	375.333	126	75	0.335702	0.56962	segmental duplication
Actinidia39479.t1	Actinidia07604.t1	0.177277	0.375035	0.472695	519	131.583	387.417	61.1667	38.8333	0.157883	0.295123	segmental duplication
Actinidia39949.t1	Actinidia35942.t1	0.137758	0.618132	0.222862	1446	338.833	1107.17	139.333	142.667	0.125847	0.421053	segmental duplication
Actinidia11565.t1	Actinidia11566.t1	0.130382	0.241818	0.539172	1317	303.167	1013.83	121.333	62.6667	0.119678	0.206707	tandem duplication
Actinidia23544.t1	Actinidia23543.t1	0.107177	0.196728	0.5448	1908	416.083	1491.92	149	72	0.0998715	0.173042	tandem duplication
Actinidia34011.t1	Actinidia34012.t1	0.455909	2.18043	0.209092	408	99.6667	308.333	105.333	70.6667	0.341622	0.70903	tandem duplication
DTZ79_01g06070	DTZ79_09g04910	0.0766035	0.195234	0.392367	573	154.167	418.833	30.5	26.5	0.0728213	0.171892	segmental duplication
DTZ79_01g06640	DTZ79_09g05570	0.106387	0.257594	0.413004	1371	336.75	1034.25	102.583	73.4167	0.0991862	0.218015	segmental duplication
DTZ79_01g10100	DTZ79_09g00250	0.0502017	0.175019	0.286836	216	51.25	164.75	8	8	0.0485584	0.156098	segmental duplication
DTZ79_01g13490	DTZ79_09g08800	0.188033	0.231901	0.810834	300	63.5	236.5	39.3333	12.6667	0.166314	0.199475	segmental duplication
DTZ79_02g03050	DTZ79_03g02550	0.217277	0.37649	0.577113	1095	264.917	830.083	156.583	78.4167	0.188636	0.296005	segmental duplication
DTZ79_03g02550	DTZ79_03g05820	0.321838	NaN	NaN	1539	369.667	1169.33	306	279	0.261688	0.754734	segmental duplication
DTZ79_04g02500	DTZ79_06g13030	0.305084	1.87367	0.162827	2649	648.917	2000.08	501.333	446.667	0.250656	0.688327	segmental duplication
DTZ79_05g01810	DTZ79_21g11110	0.0646826	0.124049	0.521428	1278	301.75	976.25	60.5	34.5	0.0619718	0.114333	segmental duplication
DTZ79_05g03250	DTZ79_09g08800	0.315472	0.565126	0.558234	489	115.25	373.75	96.25	45.75	0.257525	0.396963	segmental duplication
DTZ79_05g04700	DTZ79_27g00040	0.0714826	0.152699	0.468127	636	152	484	33	21	0.0681818	0.138158	segmental duplication
DTZ79_05g06640	DTZ79_27g02000	0.139963	0.278882	0.501872	1665	393.583	1271.42	162.333	91.6667	0.127679	0.232903	segmental duplication
DTZ79_05g07590	DTZ79_27g03340	0.0528336	0.174989	0.301924	1164	281.917	882.083	45	44	0.0510156	0.156074	segmental duplication
DTZ79_05g08430	DTZ79_27g03740	0.203852	0.253379	0.804536	417	97.6667	319.333	57	21	0.178497	0.215017	segmental duplication
DTZ79_06g00560	DTZ79_07g13270	0.0874654	0.152742	0.572634	459	109.75	349.25	28.8333	15.1667	0.0825579	0.138193	segmental duplication
DTZ79_06g03440	DTZ79_27g02000	0.33856	2.02053	0.16756	1599	378	1221	332.667	264.333	0.272454	0.699295	segmental duplication
DTZ79_06g04390	DTZ79_27g10700	0.0548442	0.145009	0.378213	912	225	687	36.3333	29.6667	0.0528869	0.131852	segmental duplication
DTZ79_06g07040	DTZ79_19g05440	0.101765	0.206584	0.49261	1803	426.417	1376.58	131	77	0.0951631	0.180575	segmental duplication
DTZ79_06g11870	DTZ79_27g05760	0.438015	1.94364	0.225358	1062	267	795	263.75	185.25	0.331761	0.69382	segmental duplication
DTZ79_08g00860	DTZ79_15g07830	0.120955	0.323716	0.373646	1407	316.333	1090.67	121.833	83.1667	0.111705	0.262908	segmental duplication
DTZ79_08g00860	DTZ79_15g07830	0.120955	0.323716	0.373646	1407	316.333	1090.67	121.833	83.1667	0.111705	0.262908	segmental duplication
DTZ79_08g00860	DTZ79_20g08350	0.212451	0.702918	0.302241	1308	295	1013	187.417	134.583	0.185012	0.456215	segmental duplication
DTZ79_08g00860	DTZ79_26g08550	0.343435	1.77427	0.193564	1467	331.083	1135.92	313	225	0.275548	0.679587	segmental duplication
DTZ79_08g08790	DTZ79_09g09770	0.0398765	0.320583	0.124387	63	11.5	51.5	2	3	0.038835	0.26087	segmental duplication
DTZ79_09g01280	DTZ79_12g01710	0.378165	1.09017	0.346886	1068	254.917	813.083	241.5	146.5	0.297018	0.574698	segmental duplication
DTZ79_09g02720	DTZ79_13g06460	0.391628	1.9158	0.204421	1101	240.833	860.167	262.417	166.583	0.305077	0.691696	segmental duplication
DTZ79_10g08120	DTZ79_11g04630	0.349762	0.839111	0.416824	1206	283.333	922.667	257.917	143.083	0.279534	0.505	segmental duplication
DTZ79_11g07750	DTZ79_16g03330	0.106129	0.277347	0.382659	537	119.333	417.667	41.3333	27.6667	0.0989625	0.231844	segmental duplication
DTZ79_11g11010	DTZ79_16g00590	0.80957	NaN	NaN	1200	288	912	451.583	216.417	0.495157	0.751447	segmental duplication
DTZ79_12g02360	DTZ79_20g11600	0.104517	0.265857	0.393131	882	205.5	676.5	66	46	0.097561	0.223844	segmental duplication
DTZ79_12g02630	DTZ79_20g11430	0.194413	0.31783	0.611689	1527	392.75	1134.25	194.25	101.75	0.171259	0.259071	segmental duplication
DTZ79_12g04680	DTZ79_20g09460	0.169455	0.227025	0.746414	432	101.25	330.75	50.1667	19.8333	0.151675	0.195885	segmental duplication
DTZ79_12g10480	DTZ79_17g08420	0.701826	NaN	NaN	831	190.167	640.833	292.083	145.917	0.455787	0.767309	segmental duplication
DTZ79_13g06460	DTZ79_16g10150	0.247336	0.590544	0.418826	594	135.583	458.417	96.5833	55.4167	0.210689	0.408728	segmental duplication
DTZ79_13g06720	DTZ79_16g10370	0.0916983	0.231692	0.395777	2163	515.917	1647.08	142.167	102.833	0.0863142	0.199322	segmental duplication
DTZ79_13g09600	DTZ79_15g03090	0.173635	0.53808	0.322694	984	229.167	754.833	117	88	0.155001	0.384	segmental duplication
DTZ79_13g09600	DTZ79_23g03720	0.0642606	0.115566	0.556053	942	219.417	722.583	44.5	23.5	0.0615846	0.107102	segmental duplication
DTZ79_13g10250	DTZ79_15g02040	0.582446	0.809078	0.719888	171	41.5833	129.417	52.4167	20.5833	0.405023	0.49499	segmental duplication
DTZ79_13g13180	DTZ79_23g07510	0.163375	0.165723	0.98583	360	79.5833	280.417	41.1667	11.8333	0.146805	0.148691	segmental duplication
DTZ79_16g05570	DTZ79_26g05750	0.0829558	0.206682	0.401369	1221	285.083	935.917	73.5	51.5	0.0785326	0.180649	segmental duplication
DTZ79_18g11350	DTZ79_19g05440	0.26856	0.713994	0.376138	1929	453.833	1475.17	333	209	0.225737	0.460521	segmental duplication
DTZ79_19g05440	DTZ79_22g08900	0.678077	1.8489	0.366746	777	180.083	596.917	266.417	123.583	0.446321	0.686256	segmental duplication
DTZ79_19g12680	DTZ79_23g15270	0.110802	0.290072	0.38198	648	154.5	493.5	50.8333	37.1667	0.103006	0.240561	segmental duplication
DTZ79_20g02790	DTZ79_25g04770	0.403508	0.672137	0.600336	810	206.5	603.5	188.333	91.6667	0.312068	0.443906	segmental duplication
DTZ79_20g07660	DTZ79_29g08220	0.103618	0.285953	0.36236	747	175.25	571.75	55.3333	41.6667	0.0967789	0.237756	segmental duplication
DTZ79_22g11050	DTZ79_22g12770	0.230643	0.488168	0.472467	249	53.4167	195.583	38.8333	19.1667	0.198551	0.358814	segmental duplication
DTZ79_22g11070	DTZ79_22g12780	0.378742	0.619179	0.611685	507	114.667	392.333	116.667	48.3333	0.297366	0.421512	segmental duplication
DTZ79_22g11120	DTZ79_22g12830	0.455725	0.775293	0.58781	405	89.5	315.5	107.75	43.25	0.341521	0.48324	segmental duplication
DTZ79_23g13430	DTZ79_29g05070	0.349826	2.01665	0.173469	1320	309.833	1010.17	282.417	216.583	0.279574	0.699032	segmental duplication
DTZ79_25g03640	DTZ79_29g05070	0.251967	0.719364	0.350264	1413	336.333	1076.67	230.417	155.583	0.214009	0.462587	segmental duplication
DTZ79_25g03920	DTZ79_27g03740	0.216677	0.977973	0.221557	414	95.1667	318.833	60	52	0.188186	0.54641	segmental duplication
DTZ79_25g04450	DTZ79_25g11430	0.26339	0.474239	0.555394	972	225	747	165.917	79.0833	0.222111	0.351481	segmental duplication
DTZ79_26g05750	DTZ79_27g00730	0.418162	1.31278	0.318532	1188	278.083	909.917	291.667	172.333	0.320542	0.619718	segmental duplication
DTZ79_26g09290	DTZ79_28g08840	0.180562	0.305925	0.590217	1011	239.833	771.167	123.75	60.25	0.160471	0.251216	segmental duplication
DTZ79_27g03740	DTZ79_27g09710	0.393822	1.85162	0.212691	414	92.5	321.5	98.5	63.5	0.306376	0.686486	segmental duplication
DTZ79_29g00630	DTZ79_29g13140	0.322477	0.579634	0.556346	1425	335.417	1089.58	285.583	135.417	0.262103	0.403727	segmental duplication
DTZ79_29g00650	DTZ79_29g13130	0.137527	0.131587	1.04514	249	58	191	24	7	0.125654	0.12069	segmental duplication
DTZ79_04g03950	DTZ79_04g03960	0.327902	0.566402	0.57892	942	225.75	716.25	190.25	89.75	0.26562	0.397564	tandem duplication
DTZ79_08g05460	DTZ79_08g05470	0.418179	0.917707	0.455678	1149	266.667	882.333	282.833	141.167	0.320552	0.529375	tandem duplication
DTZ79_09g02860	DTZ79_09g02870	0.165816	0.317545	0.522181	2277	501.833	1775.17	264.083	129.917	0.148765	0.258884	tandem duplication
DTZ79_09g02920	DTZ79_09g02930	0.125942	0.219947	0.5726	2811	617.25	2193.75	254.333	117.667	0.115935	0.19063	tandem duplication
DTZ79_16g10090	DTZ79_16g10100	0.270248	0.632169	0.427492	330	75.5	254.5	57.75	32.25	0.226916	0.427152	tandem duplication
DTZ79_22g11060	DTZ79_22g11070	0.233883	0.364956	0.640852	606	139	467	93.8333	40.1667	0.200928	0.288969	tandem duplication
DTZ79_22g12830	DTZ79_22g12840	0.542593	1.28198	0.423247	864	198.75	665.25	256.917	122.083	0.386196	0.614256	tandem duplication
DTZ79_27g00620	DTZ79_27g00630	0.360567	1.73143	0.208248	1326	306.833	1019.17	291.75	207.25	0.286263	0.675448	tandem duplication
DTZ79_29g00650	DTZ79_29g00660	0.337332	0.645459	0.522623	1644	380.833	1263.17	343.167	164.833	0.271672	0.432823	tandem duplication
Acc00299	Acc02143	0.30124	1.00071	0.301025	447	108.75	338.25	83.9167	60.0833	0.248091	0.55249	segmental duplication
Acc00508	Acc30938	0.147721	0.525673	0.281012	798	205.083	592.917	79.5	77.5	0.134083	0.377895	segmental duplication
Acc00508	Acc05957	0.149073	0.516534	0.288602	798	206.25	591.75	80	77	0.135192	0.373333	segmental duplication
Acc00508	Acc10246	0.0463637	0.180735	0.256528	798	208.583	589.417	26.5	33.5	0.0449597	0.160607	segmental duplication
Acc00565	Acc06934	0.350623	2.08973	0.167784	1302	310	992	277.833	218.167	0.280074	0.703763	segmental duplication
Acc00722	Acc10089	0.0680085	0.251855	0.27003	1458	350.583	1107.42	72	75	0.0650162	0.213929	segmental duplication
Acc00852	Acc10208	0.0230058	0.078922	0.2915	2127	493.917	1633.08	37	37	0.0226565	0.0749114	segmental duplication
Acc00890	Acc09782	0.0325452	0.195066	0.166842	1038	242.583	795.417	25.3333	41.6667	0.0318491	0.171762	segmental duplication
Acc01047	Acc23599	0.382259	1.23851	0.308645	552	132.667	419.333	125.583	80.4167	0.299483	0.606156	segmental duplication
Acc01047	Acc10415	0.0397843	0.247561	0.160705	561	135.167	425.833	16.5	28.5	0.0387476	0.210851	segmental duplication
Acc01502	Acc31883	0.338792	1.36704	0.247829	1125	278.833	846.167	230.667	175.333	0.272602	0.628811	segmental duplication
Acc01809	Acc03000	0.10896	0.318012	0.34263	1341	310.583	1030.42	104.5	80.5	0.101415	0.25919	segmental duplication
Acc06140	Acc08290	0.0318406	0.146466	0.217393	639	157.833	481.167	15	21	0.0311742	0.133052	segmental duplication
Acc12530	Acc17862	0.10837	0.345047	0.314073	1314	309.75	1004.25	101.333	85.6667	0.100904	0.276567	segmental duplication
Acc13043	Acc23297	0.045962	0.186341	0.246656	1233	290.917	942.083	42	48	0.044582	0.164996	segmental duplication
Acc13043	Acc09872	0.205621	0.990379	0.207619	1137	266.333	870.667	156.583	146.417	0.179843	0.54975	segmental duplication
Acc13251	Acc23067	0.0335779	0.136988	0.245115	639	151.75	487.25	16	19	0.0328374	0.125206	segmental duplication
Acc13943	Acc18876	0.0470024	0.178132	0.263863	1380	337.417	1042.58	47.5	53.5	0.0455599	0.158558	segmental duplication
Acc14222	Acc22028	0.260747	2.61461	0.0997267	960	224.083	735.917	162.083	162.917	0.220247	0.727036	segmental duplication
Acc14785	Acc31883	0.106623	0.38965	0.273638	1146	284.083	861.917	85.6667	86.3333	0.0993909	0.303901	segmental duplication
Acc16306	Acc08290	0.475063	2.26174	0.210043	573	136.583	436.417	153.583	97.4167	0.351919	0.71324	segmental duplication
Acc16812	Acc08635	0.159123	0.391994	0.405931	1929	459.667	1469.33	210.667	140.333	0.143376	0.305294	segmental duplication
Acc17095	Acc30415	0.22052	1.17002	0.188475	1089	276.417	812.583	155.25	163.75	0.191057	0.592403	segmental duplication
Acc17095	Acc32474	0.21244	1.1411	0.186171	1089	275.5	813.5	150.5	161.5	0.185003	0.586207	segmental duplication
Acc17095	Acc09317	0.038929	0.268351	0.145067	1092	274.833	817.167	31	62	0.037936	0.225591	segmental duplication
Acc17365	Acc19015	0.336028	1.89884	0.176965	1449	349.333	1099.67	297.833	241.167	0.27084	0.690363	segmental duplication
Acc18119	Acc29772	0.0475328	0.203933	0.23308	2901	697.25	2203.75	101.5	124.5	0.0460579	0.178559	segmental duplication
Acc18306	Acc26678	0.197832	1.12673	0.17558	2115	494.25	1620.75	281.833	288.167	0.173891	0.583038	segmental duplication
Acc19015	Acc09586	0.337236	1.84862	0.182426	1455	349.25	1105.75	300.333	239.667	0.271611	0.686232	segmental duplication
Acc20892	Acc25358	0.0370596	0.191163	0.193864	1365	314.083	1050.92	38	53	0.0361589	0.168745	segmental duplication
Acc21379	Acc06543	0.133691	0.254545	0.525213	603	140.917	462.083	56.5833	30.4167	0.122453	0.215849	segmental duplication
Acc22028	Acc26770	0.100539	0.304283	0.330413	696	169.917	526.083	49.5	42.5	0.0940916	0.250123	segmental duplication
Acc22154	Acc22195	0.0273009	0.090384	0.302055	1692	405.167	1286.83	34.5	34.5	0.02681	0.0851501	segmental duplication
Acc23297	Acc09872	0.204312	0.990677	0.206235	1143	268.417	874.583	156.417	147.583	0.178847	0.549829	segmental duplication
Acc23599	Acc10415	0.364114	1.39568	0.260887	1260	311.833	948.167	273.5	197.5	0.288451	0.633351	segmental duplication
Acc24314	Acc05321	0.0351352	0.157166	0.223555	1713	402	1311	45	57	0.0343249	0.141791	segmental duplication
Acc25763	Acc31883	0.10149	0.408388	0.248513	1134	278.917	855.083	81.1667	87.8333	0.0949225	0.314909	segmental duplication
Acc26620	Acc28557	0.320476	1.84379	0.173813	1353	313.25	1039.75	271.167	214.833	0.2608	0.685821	segmental duplication
Acc26620	Acc32892	0.298272	1.55782	0.191468	1371	318.583	1052.42	259	209	0.2461	0.656029	segmental duplication
Acc28060	Acc03461	0.375197	1.32759	0.282615	2775	647.5	2127.5	628.083	402.917	0.295221	0.622265	segmental duplication
Acc28557	Acc32892	0.181791	0.568559	0.319739	1428	339.333	1088.67	175.75	135.25	0.161436	0.398576	segmental duplication
Acc29914	Acc32004	0.0480649	0.250614	0.191788	1419	354	1065	49.5833	75.4167	0.0465571	0.213041	segmental duplication
Acc29959	Acc29982	0.0432275	0.161287	0.268016	1356	320.417	1035.58	43.5	46.5	0.0420053	0.145124	segmental duplication
Acc30038	Acc32087	0.0450332	0.0894763	0.503298	588	130.417	457.583	20	11	0.0437079	0.084345	segmental duplication
Acc30286	Acc32351	0.0590443	0.105205	0.561231	873	203.75	669.25	38	20	0.05678	0.0981595	segmental duplication
Acc30415	Acc32474	0.0143321	0.156954	0.0913141	1089	278.917	810.083	11.5	39.5	0.0141961	0.141619	segmental duplication
Acc30415	Acc09317	0.216593	1.0127	0.213876	1089	277.917	811.083	152.583	154.417	0.188123	0.555622	segmental duplication
Acc31479	Acc06377	0.0205211	0.115442	0.177762	984	243	741	15	26	0.0202429	0.106996	segmental duplication
Acc31883	Acc03068	0.267327	1.46241	0.182799	1146	280.333	865.667	194.667	180.333	0.224875	0.643282	segmental duplication
Acc31883	Acc02774	0.261186	1.32387	0.19729	1140	278.167	861.833	190.083	172.917	0.220557	0.62163	segmental duplication
Acc32474	Acc09317	0.220842	1.02335	0.215802	1089	277	812	155.333	154.667	0.191297	0.558363	segmental duplication
Acc01048	Acc01049	0.00691488	0.0257997	0.268021	1926	473.167	1452.83	10	12	0.0068831	0.025361	tandem duplication
Acc01810	Acc01811	0.237878	0.512619	0.464044	1857	426.583	1430.42	291.583	158.417	0.203845	0.371362	tandem duplication
Acc03000	Acc03001	0.0834039	0.166862	0.499837	3126	725.25	2400.75	189.5	108.5	0.0789337	0.149604	tandem duplication
Acc10059	Acc10060	0.105278	0.163132	0.645358	2961	644	2317	227.583	94.4167	0.0982233	0.14661	tandem duplication
Acc25328	Acc25329	0.12223	0.165098	0.740347	2616	591.583	2024.42	228.333	87.6667	0.11279	0.14819	tandem duplication
Acc25329	Acc25330	0.129545	0.154089	0.84072	2250	507.333	1742.67	207.333	70.6667	0.118975	0.13929	tandem duplication
Acc25330	Acc25331	0.176669	0.192418	0.91815	1317	300.5	1016.5	160	51	0.157403	0.169717	tandem duplication
