# Supplementary material for: Genome-Wide Identification and Expression Analysis of Kiwifruit Leucine-Rich Repeat Receptor-Like Proteins Reveal Their Roles in Biotic and Abiotic Stress Responses
Source: Int J Mol Sci. 2024 Apr 19;25(8):4497. doi: 10.3390/ijms25084497 (PMC11050117; doi:10.3390/ijms25084497)
Supplement: Supplementary file 1 [file ijms-25-04497-s001.zip › Table S7.xlsx]

## Sheet: Sheet1
Table S7. Transcription factor corresponding family
Transcription factors	family
Actinidia00657.t2	ERF
Actinidia01659.t1	MYB
Actinidia02179.t1	ERF
Actinidia02807.t1	bZIP
Actinidia04329.t1	TCP
Actinidia06106.t1	WRKY
Actinidia08281.t1	WRKY
Actinidia09453.t1	bHLH
Actinidia10240.t1	TALE
Actinidia10847.t1	ERF
Actinidia12078.t1	Dof
Actinidia12297.t1	NAC
Actinidia13003.t1	HD-ZIP
Actinidia13368.t2	CAMTA
Actinidia13641.t1	WRKY
Actinidia14109.t1	ERF
Actinidia14806.t1	bHLH
Actinidia14858.t1	G2-like
Actinidia15498.t1	Nin-like
Actinidia17974.t1	C2H2
Actinidia18972.t1	Dof
Actinidia20296.t1	bHLH
Actinidia20508.t1	MYB
Actinidia20994.t1	bZIP
Actinidia22258.t1	WRKY
Actinidia22851.t1	MYB
Actinidia23189.t1	WRKY
Actinidia24652.t1	MYB_related
Actinidia24811.t1	WRKY
Actinidia25964.t1	bHLH
Actinidia26254.t1	TCP
Actinidia26649.t1	C2H2
Actinidia29458.t1	ERF
Actinidia30630.t1	WRKY
Actinidia32152.t1	C2H2
Actinidia36651.t1	GRAS
Actinidia36885.t1	WRKY
Actinidia37473.t1	C2H2
Actinidia38060.t2	bZIP
Actinidia39836.t2	C2H2
